# Supplementary material
Source: publisher figshare collection journal article supplement (https://acs.figshare.com/ndownloader/files/5334883)
Supplement: Supplementary file 1 [file 5334883]

data_2c 
 
_audit_creation_method            SHELXL-97 
_chemical_name_systematic 
; 
 ? 
; 
_chemical_name_common             ? 
_chemical_melting_point           ? 
_chemical_formula_moiety          ? 
_chemical_formula_sum 
 'C20 H24 N2 O2' 
_chemical_formula_weight          324.41 
 
loop_ 
 _atom_type_symbol 
 _atom_type_description 
 _atom_type_scat_dispersion_real 
 _atom_type_scat_dispersion_imag 
 _atom_type_scat_source 
 'C'  'C'   0.0033   0.0016 
 'International Tables Vol C Tables 4.2.6.8 and 6.1.1.4' 
 'H'  'H'   0.0000   0.0000 
 'International Tables Vol C Tables 4.2.6.8 and 6.1.1.4' 
 'N'  'N'   0.0061   0.0033 
 'International Tables Vol C Tables 4.2.6.8 and 6.1.1.4' 
 'O'  'O'   0.0106   0.0060 
 'International Tables Vol C Tables 4.2.6.8 and 6.1.1.4' 
 
_symmetry_cell_setting            Monoclinic 
_symmetry_space_group_name_H-M    P2(1)/c 
 
loop_ 
 _symmetry_equiv_pos_as_xyz 
 'x, y, z' 
 '-x, y+1/2, -z+1/2' 
 '-x, -y, -z' 
 'x, -y-1/2, z-1/2' 
 
_cell_length_a                    12.402(3) 
_cell_length_b                    5.1053(10) 
_cell_length_c                    14.286(3) 
_cell_angle_alpha                 90.00 
_cell_angle_beta                  109.84(3) 
_cell_angle_gamma                 90.00 
_cell_volume                      850.9(3) 
_cell_formula_units_Z             2 
_cell_measurement_temperature     293(2) 
_cell_measurement_reflns_used     25 
_cell_measurement_theta_min       8 
_cell_measurement_theta_max       12 
 
_exptl_crystal_description        needle 
_exptl_crystal_colour             colorless 
_exptl_crystal_size_max           0.15 
_exptl_crystal_size_mid           0.12 
_exptl_crystal_size_min           0.10 
_exptl_crystal_density_meas       'not measured' 
_exptl_crystal_density_diffrn     1.266 
_exptl_crystal_density_method     'not measured' 
_exptl_crystal_F_000              348 
_exptl_absorpt_coefficient_mu     0.082 
_exptl_absorpt_correction_type    none 
_exptl_absorpt_correction_T_min   ? 
_exptl_absorpt_correction_T_max   ? 
_exptl_absorpt_process_details    ? 
 
_exptl_special_details 
; 
 ? 
; 
 
_diffrn_ambient_temperature       293(2) 
_diffrn_radiation_wavelength      0.71073 
_diffrn_radiation_type            MoK\a 
_diffrn_radiation_source          'fine-focus sealed tube' 
_diffrn_radiation_monochromator   graphite 
_diffrn_measurement_device_type   CAD4
_diffrn_measurement_method        \w-scan 
_diffrn_detector_area_resol_mean  ? 
_diffrn_standards_number          3 
_diffrn_standards_interval_count  ? 
_diffrn_standards_interval_time   60 
_diffrn_standards_decay_%         0
_diffrn_reflns_number             1558 
_diffrn_reflns_av_R_equivalents   0.0553 
_diffrn_reflns_av_sigmaI/netI     0.0651 
_diffrn_reflns_limit_h_min        0 
_diffrn_reflns_limit_h_max        14 
_diffrn_reflns_limit_k_min        0 
_diffrn_reflns_limit_k_max        6 
_diffrn_reflns_limit_l_min        -16 
_diffrn_reflns_limit_l_max        15 
_diffrn_reflns_theta_min          1.75 
_diffrn_reflns_theta_max          24.97 
_reflns_number_total              1486 
_reflns_number_gt                 864 
_reflns_threshold_expression      >2sigma(I) 
 
_computing_data_collection        CAD4 
_computing_cell_refinement        CAD4 
_computing_data_reduction         CAD4 
_computing_structure_solution     'SHELXS-97 (Sheldrick, 1990)' 
_computing_structure_refinement   'SHELXL-97 (Sheldrick, 1997)' 
_computing_molecular_graphics     ? 
_computing_publication_material   ? 
 
_refine_special_details 
; 
 Refinement of F^2^ against ALL reflections.  The weighted R-factor wR and 
 goodness of fit S are based on F^2^, conventional R-factors R are based 
 on F, with F set to zero for negative F^2^. The threshold expression of 
 F^2^ > 2sigma(F^2^) is used only for calculating R-factors(gt) etc. and is 
 not relevant to the choice of reflections for refinement.  R-factors based 
 on F^2^ are statistically about twice as large as those based on F, and R- 
 factors based on ALL data will be even larger. 
; 
 
_refine_ls_structure_factor_coef  Fsqd  
_refine_ls_matrix_type            full 
_refine_ls_weighting_scheme       calc  
_refine_ls_weighting_details 
 'calc w=1/[\s^2^(Fo^2^)+(0.0800P)^2^+0.0000P] where P=(Fo^2^+2Fc^2^)/3' 
_atom_sites_solution_primary      direct 
_atom_sites_solution_secondary    difmap 
_atom_sites_solution_hydrogens    geom 
_refine_ls_hydrogen_treatment     constr 
_refine_ls_extinction_method      SHELXL 
_refine_ls_extinction_coef        0.048(8) 
_refine_ls_extinction_expression 
 'Fc^*^=kFc[1+0.001xFc^2^\l^3^/sin(2\q)]^-1/4^' 
_refine_ls_number_reflns          1486 
_refine_ls_number_parameters      110 
_refine_ls_number_restraints      0 
_refine_ls_R_factor_all           0.1217 
_refine_ls_R_factor_gt            0.0505 
_refine_ls_wR_factor_ref          0.1496 
_refine_ls_wR_factor_gt           0.1216 
_refine_ls_goodness_of_fit_ref    1.016 
_refine_ls_restrained_S_all       1.016 
_refine_ls_shift/su_max           0.000 
_refine_ls_shift/su_mean          0.000 
 
loop_ 
 _atom_site_label 
 _atom_site_type_symbol 
 _atom_site_fract_x 
 _atom_site_fract_y 
 _atom_site_fract_z 
 _atom_site_U_iso_or_equiv 
 _atom_site_adp_type 
 _atom_site_occupancy 
 _atom_site_symmetry_multiplicity 
 _atom_site_calc_flag 
 _atom_site_refinement_flags 
 _atom_site_disorder_assembly 
 _atom_site_disorder_group 
C11 C 0.7997(2) -0.2466(5) 0.18469(19) 0.0413(7) Uani 1 1 d . . . 
C12 C 0.7786(2) -0.0528(5) 0.1140(2) 0.0488(8) Uani 1 1 d . . . 
H12 H 0.7226 0.0730 0.1089 0.059 Uiso 1 1 calc R . . 
C13 C 0.8415(3) -0.0469(6) 0.0505(2) 0.0559(9) Uani 1 1 d . . . 
H13 H 0.8281 0.0845 0.0028 0.067 Uiso 1 1 calc R . . 
C14 C 0.9228(3) -0.2317(7) 0.0572(2) 0.0614(10) Uani 1 1 d . . . 
H14 H 0.9643 -0.2270 0.0139 0.074 Uiso 1 1 calc R . . 
C15 C 0.9438(3) -0.4250(6) 0.1279(2) 0.0604(9) Uani 1 1 d . . . 
H15 H 0.9994 -0.5511 0.1324 0.073 Uiso 1 1 calc R . . 
C16 C 0.8825(3) -0.4322(6) 0.1922(2) 0.0513(8) Uani 1 1 d . . . 
H16 H 0.8970 -0.5622 0.2405 0.062 Uiso 1 1 calc R . . 
O21 O 0.70364(19) 0.1517(4) 0.27606(15) 0.0596(7) Uani 1 1 d . . . 
N21 N 0.7342(2) -0.2731(4) 0.24853(16) 0.0467(7) Uani 1 1 d . . . 
H21 H 0.7230 -0.4304 0.2647 0.056 Uiso 1 1 calc R . . 
C21 C 0.6876(2) -0.0801(5) 0.28679(19) 0.0428(7) Uani 1 1 d . . . 
C22 C 0.6096(3) -0.1764(5) 0.3399(2) 0.0465(7) Uani 1 1 d . . . 
H22A H 0.6382 -0.3434 0.3707 0.056 Uiso 1 1 calc . . . 
H22B H 0.5342 -0.2064 0.2912 0.056 Uiso 1 1 calc . . . 
C23 C 0.5977(2) 0.0072(5) 0.4188(2) 0.0451(7) Uani 1 1 d . . . 
H23A H 0.6710 0.0231 0.4719 0.054 Uiso 1 1 calc . . . 
H23B H 0.5757 0.1795 0.3901 0.054 Uiso 1 1 calc . . . 
C24 C 0.5090(2) -0.0901(5) 0.4615(2) 0.0461(8) Uani 1 1 d . . . 
H24A H 0.4367 -0.1120 0.4077 0.055 Uiso 1 1 calc . . . 
H24B H 0.5325 -0.2606 0.4914 0.055 Uiso 1 1 calc . . . 
 
loop_ 
 _atom_site_aniso_label 
 _atom_site_aniso_U_11 
 _atom_site_aniso_U_22 
 _atom_site_aniso_U_33 
 _atom_site_aniso_U_23 
 _atom_site_aniso_U_13 
 _atom_site_aniso_U_12 
C11 0.0557(18) 0.0331(14) 0.0449(15) -0.0058(13) 0.0297(14) -0.0032(14) 
C12 0.063(2) 0.0395(15) 0.0550(17) 0.0041(14) 0.0351(16) 0.0056(15) 
C13 0.084(2) 0.0445(17) 0.0536(17) 0.0021(15) 0.0414(18) -0.0056(17) 
C14 0.082(2) 0.0526(19) 0.074(2) -0.0109(18) 0.057(2) -0.0084(18) 
C15 0.067(2) 0.053(2) 0.077(2) -0.0095(18) 0.0445(19) 0.0045(17) 
C16 0.0638(19) 0.0416(16) 0.0534(17) 0.0014(14) 0.0260(16) 0.0053(15) 
O21 0.0975(17) 0.0273(10) 0.0792(15) -0.0004(10) 0.0629(14) -0.0042(11) 
N21 0.0721(17) 0.0277(12) 0.0559(14) 0.0012(11) 0.0419(13) -0.0010(12) 
C21 0.0595(19) 0.0324(16) 0.0453(16) 0.0001(12) 0.0294(15) -0.0018(14) 
C22 0.0651(19) 0.0354(15) 0.0501(16) -0.0031(13) 0.0340(15) -0.0068(14) 
C23 0.0593(18) 0.0384(15) 0.0477(15) -0.0004(13) 0.0314(14) -0.0049(13) 
C24 0.0603(18) 0.0405(16) 0.0475(15) 0.0027(13) 0.0311(15) -0.0038(14) 
 
_geom_special_details 
; 
 All esds (except the esd in the dihedral angle between two l.s. planes) 
 are estimated using the full covariance matrix.  The cell esds are taken 
 into account individually in the estimation of esds in distances, angles 
 and torsion angles; correlations between esds in cell parameters are only 
 used when they are defined by crystal symmetry.  An approximate (isotropic) 
 treatment of cell esds is used for estimating esds involving l.s. planes. 
; 
 
loop_ 
 _geom_bond_atom_site_label_1 
 _geom_bond_atom_site_label_2 
 _geom_bond_distance 
 _geom_bond_site_symmetry_2 
 _geom_bond_publ_flag 
C11 C12 1.374(4) . ? 
C11 C16 1.374(4) . ? 
C11 N21 1.419(3) . ? 
C12 C13 1.383(4) . ? 
C13 C14 1.360(4) . ? 
C14 C15 1.372(4) . ? 
C15 C16 1.377(4) . ? 
O21 C21 1.218(3) . ? 
N21 C21 1.349(3) . ? 
C21 C22 1.500(4) . ? 
C22 C23 1.512(4) . ? 
C23 C24 1.510(4) . ? 
C24 C24 1.508(5) 3_656 ? 
 
loop_ 
 _geom_angle_atom_site_label_1 
 _geom_angle_atom_site_label_2 
 _geom_angle_atom_site_label_3 
 _geom_angle 
 _geom_angle_site_symmetry_1 
 _geom_angle_site_symmetry_3 
 _geom_angle_publ_flag 
C12 C11 C16 120.3(2) . . ? 
C12 C11 N21 122.2(2) . . ? 
C16 C11 N21 117.4(2) . . ? 
C11 C12 C13 119.3(3) . . ? 
C14 C13 C12 120.5(3) . . ? 
C13 C14 C15 120.1(3) . . ? 
C14 C15 C16 120.0(3) . . ? 
C11 C16 C15 119.8(3) . . ? 
C21 N21 C11 127.5(2) . . ? 
O21 C21 N21 123.2(2) . . ? 
O21 C21 C22 122.9(2) . . ? 
N21 C21 C22 113.8(2) . . ? 
C21 C22 C23 114.7(2) . . ? 
C24 C23 C22 111.5(2) . . ? 
C24 C24 C23 113.7(3) 3_656 . ? 
 
_diffrn_measured_fraction_theta_max    1.000 
_diffrn_reflns_theta_full              24.97 
_diffrn_measured_fraction_theta_full   1.000 
_refine_diff_density_max    0.177 
_refine_diff_density_min   -0.192 
_refine_diff_density_rms    0.041 
#end
data_4a 
 
_audit_creation_method            SHELXL-97 
_chemical_name_systematic 
; 
 ? 
; 
_chemical_name_common             ? 
_chemical_melting_point           ? 
_chemical_formula_moiety          ? 
_chemical_formula_sum 
 'C14 H14 N4 O2' 
_chemical_formula_weight          270.29 
 
loop_ 
 _atom_type_symbol 
 _atom_type_description 
 _atom_type_scat_dispersion_real 
 _atom_type_scat_dispersion_imag 
 _atom_type_scat_source 
 'C'  'C'   0.0033   0.0016 
 'International Tables Vol C Tables 4.2.6.8 and 6.1.1.4' 
 'H'  'H'   0.0000   0.0000 
 'International Tables Vol C Tables 4.2.6.8 and 6.1.1.4' 
 'N'  'N'   0.0061   0.0033 
 'International Tables Vol C Tables 4.2.6.8 and 6.1.1.4' 
 'O'  'O'   0.0106   0.0060 
 'International Tables Vol C Tables 4.2.6.8 and 6.1.1.4' 
 
_symmetry_cell_setting            Monoclinic 
_symmetry_space_group_name_H-M    P2(1)/n 
 
loop_ 
 _symmetry_equiv_pos_as_xyz 
 'x, y, z' 
 '-x+1/2, y+1/2, -z+1/2' 
 '-x, -y, -z' 
 'x-1/2, -y-1/2, z-1/2' 
 
_cell_length_a                    7.7370(15) 
_cell_length_b                    8.1290(16) 
_cell_length_c                    10.546(2) 
_cell_angle_alpha                 90.00 
_cell_angle_beta                  102.05(3) 
_cell_angle_gamma                 90.00 
_cell_volume                      648.7(2) 
_cell_formula_units_Z             2 
_cell_measurement_temperature     293(2) 
_cell_measurement_reflns_used     25 
_cell_measurement_theta_min       8 
_cell_measurement_theta_max       12 
 
_exptl_crystal_description        needle 
_exptl_crystal_colour             colorless 
_exptl_crystal_size_max           0.16 
_exptl_crystal_size_mid           0.13 
_exptl_crystal_size_min           0.10 
_exptl_crystal_density_meas       'not measured' 
_exptl_crystal_density_diffrn     1.384 
_exptl_crystal_density_method     'not measured' 
_exptl_crystal_F_000              284 
_exptl_absorpt_coefficient_mu     0.097 
_exptl_absorpt_correction_type    none 
_exptl_absorpt_correction_T_min   ? 
_exptl_absorpt_correction_T_max   ? 
_exptl_absorpt_process_details    ? 
 
_exptl_special_details 
; 
 ? 
; 
 
_diffrn_ambient_temperature       293(2) 
_diffrn_radiation_wavelength      0.71073 
_diffrn_radiation_type            MoK\a 
_diffrn_radiation_source          'fine-focus sealed tube' 
_diffrn_radiation_monochromator   graphite 
_diffrn_measurement_device_type   CAD4 
_diffrn_measurement_method        \w-scan 
_diffrn_detector_area_resol_mean  ? 
_diffrn_standards_number          3 
_diffrn_standards_interval_count  ? 
_diffrn_standards_interval_time   60 
_diffrn_standards_decay_%         0 
_diffrn_reflns_number             1225 
_diffrn_reflns_av_R_equivalents   0.0067 
_diffrn_reflns_av_sigmaI/netI     0.0371 
_diffrn_reflns_limit_h_min        -9 
_diffrn_reflns_limit_h_max        0 
_diffrn_reflns_limit_k_min        0 
_diffrn_reflns_limit_k_max        9 
_diffrn_reflns_limit_l_min        -12 
_diffrn_reflns_limit_l_max        12 
_diffrn_reflns_theta_min          2.99 
_diffrn_reflns_theta_max          24.95 
_reflns_number_total              1137 
_reflns_number_gt                 897 
_reflns_threshold_expression      >2sigma(I) 
 
_computing_data_collection        ? 
_computing_cell_refinement        ? 
_computing_data_reduction         ? 
_computing_structure_solution     'SHELXS-97 (Sheldrick, 1990)' 
_computing_structure_refinement   'SHELXL-97 (Sheldrick, 1997)' 
_computing_molecular_graphics     ? 
_computing_publication_material   ? 
 
_refine_special_details 
; 
 Refinement of F^2^ against ALL reflections.  The weighted R-factor wR and 
 goodness of fit S are based on F^2^, conventional R-factors R are based 
 on F, with F set to zero for negative F^2^. The threshold expression of 
 F^2^ > 2sigma(F^2^) is used only for calculating R-factors(gt) etc. and is 
 not relevant to the choice of reflections for refinement.  R-factors based 
 on F^2^ are statistically about twice as large as those based on F, and R- 
 factors based on ALL data will be even larger. 
; 
 
_refine_ls_structure_factor_coef  Fsqd  
_refine_ls_matrix_type            full 
_refine_ls_weighting_scheme       calc  
_refine_ls_weighting_details 
 'calc w=1/[\s^2^(Fo^2^)+(0.0652P)^2^+0.3775P] where P=(Fo^2^+2Fc^2^)/3' 
_atom_sites_solution_primary      direct 
_atom_sites_solution_secondary    difmap 
_atom_sites_solution_hydrogens    geom 
_refine_ls_hydrogen_treatment     constr
_refine_ls_extinction_method      none 
_refine_ls_extinction_coef        ? 
_refine_ls_number_reflns          1137 
_refine_ls_number_parameters      91 
_refine_ls_number_restraints      0 
_refine_ls_R_factor_all           0.0628 
_refine_ls_R_factor_gt            0.0461 
_refine_ls_wR_factor_ref          0.1390 
_refine_ls_wR_factor_gt           0.1170 
_refine_ls_goodness_of_fit_ref    1.000 
_refine_ls_restrained_S_all       1.000 
_refine_ls_shift/su_max           0.001 
_refine_ls_shift/su_mean          0.000 
 
loop_ 
 _atom_site_label 
 _atom_site_type_symbol 
 _atom_site_fract_x 
 _atom_site_fract_y 
 _atom_site_fract_z 
 _atom_site_U_iso_or_equiv 
 _atom_site_adp_type 
 _atom_site_occupancy 
 _atom_site_symmetry_multiplicity 
 _atom_site_calc_flag 
 _atom_site_refinement_flags 
 _atom_site_disorder_assembly 
 _atom_site_disorder_group 
N1 N -0.2291(2) 0.1501(3) -0.18486(15) 0.0472(5) Uani 1 1 d . . . 
N2 N 0.1576(2) 0.3377(2) 0.03070(14) 0.0371(4) Uani 1 1 d . . . 
H2 H 0.1855 0.3564 0.1127 0.045 Uiso 1 1 calc R . . 
O6 O 0.2462(3) 0.3850(3) -0.15746(15) 0.0844(8) Uani 1 1 d . . . 
C1 C -0.0018(2) 0.2541(2) -0.01342(18) 0.0341(5) Uani 1 1 d . . . 
C2 C -0.0793(3) 0.2328(3) -0.14400(19) 0.0426(5) Uani 1 1 d . . . 
H2A H -0.0236 0.2787 -0.2057 0.051 Uiso 1 1 calc R . . 
C3 C -0.3080(3) 0.0842(3) -0.0963(2) 0.0503(6) Uani 1 1 d . . . 
H3 H -0.4119 0.0250 -0.1240 0.060 Uiso 1 1 calc R . . 
C4 C -0.2420(3) 0.1003(3) 0.0345(2) 0.0506(6) Uani 1 1 d . . . 
H4 H -0.3008 0.0532 0.0940 0.061 Uiso 1 1 calc R . . 
C5 C -0.0881(3) 0.1868(3) 0.07647(18) 0.0410(5) Uani 1 1 d . . . 
H5 H -0.0424 0.2000 0.1647 0.049 Uiso 1 1 calc R . . 
C6 C 0.2729(3) 0.3928(3) -0.03984(19) 0.0440(5) Uani 1 1 d . . . 
C7 C 0.4396(3) 0.4653(3) 0.04011(19) 0.0474(6) Uani 1 1 d . . . 
H7A H 0.4082 0.5517 0.0946 0.057 Uiso 1 1 calc . . . 
H7B H 0.5020 0.3806 0.0965 0.057 Uiso 1 1 calc . . . 
 
loop_ 
 _atom_site_aniso_label 
 _atom_site_aniso_U_11 
 _atom_site_aniso_U_22 
 _atom_site_aniso_U_33 
 _atom_site_aniso_U_23 
 _atom_site_aniso_U_13 
 _atom_site_aniso_U_12 
N1 0.0412(10) 0.0655(13) 0.0323(9) -0.0037(8) 0.0014(7) -0.0046(8) 
N2 0.0362(9) 0.0509(10) 0.0241(7) -0.0030(7) 0.0060(6) -0.0070(7) 
O6 0.0782(13) 0.147(2) 0.0316(9) -0.0151(10) 0.0191(8) -0.0572(13) 
C1 0.0347(9) 0.0414(11) 0.0256(9) -0.0003(8) 0.0048(7) 0.0016(8) 
C2 0.0424(11) 0.0571(13) 0.0277(10) 0.0021(9) 0.0061(8) -0.0067(10) 
C3 0.0380(11) 0.0678(15) 0.0450(12) -0.0064(11) 0.0081(9) -0.0112(11) 
C4 0.0446(12) 0.0695(16) 0.0401(11) 0.0017(11) 0.0144(9) -0.0124(11) 
C5 0.0394(11) 0.0562(13) 0.0269(9) 0.0002(9) 0.0053(8) -0.0036(9) 
C6 0.0465(12) 0.0572(13) 0.0299(10) -0.0040(9) 0.0114(8) -0.0108(10) 
C7 0.0441(12) 0.0631(14) 0.0365(11) -0.0033(10) 0.0118(9) -0.0137(10) 
 
_geom_special_details 
; 
 All esds (except the esd in the dihedral angle between two l.s. planes) 
 are estimated using the full covariance matrix.  The cell esds are taken 
 into account individually in the estimation of esds in distances, angles 
 and torsion angles; correlations between esds in cell parameters are only 
 used when they are defined by crystal symmetry.  An approximate (isotropic) 
 treatment of cell esds is used for estimating esds involving l.s. planes. 
; 
 
loop_ 
 _geom_bond_atom_site_label_1 
 _geom_bond_atom_site_label_2 
 _geom_bond_distance 
 _geom_bond_site_symmetry_2 
 _geom_bond_publ_flag 
N1 C3 1.330(3) . ? 
N1 C2 1.332(3) . ? 
N2 C6 1.351(2) . ? 
N2 C1 1.400(3) . ? 
O6 C6 1.216(2) . ? 
C1 C5 1.381(3) . ? 
C1 C2 1.393(3) . ? 
C3 C4 1.374(3) . ? 
C4 C5 1.374(3) . ? 
C6 C7 1.506(3) . ? 
C7 C7 1.497(4) 3_665 ? 
 
loop_ 
 _geom_angle_atom_site_label_1 
 _geom_angle_atom_site_label_2 
 _geom_angle_atom_site_label_3 
 _geom_angle 
 _geom_angle_site_symmetry_1 
 _geom_angle_site_symmetry_3 
 _geom_angle_publ_flag 
C3 N1 C2 118.17(17) . . ? 
C6 N2 C1 127.92(16) . . ? 
C5 C1 N2 118.86(16) . . ? 
C5 C1 C2 117.34(18) . . ? 
N2 C1 C2 123.79(17) . . ? 
N1 C2 C1 123.26(19) . . ? 
N1 C3 C4 122.6(2) . . ? 
C3 C4 C5 119.15(19) . . ? 
C4 C5 C1 119.51(18) . . ? 
O6 C6 N2 123.62(19) . . ? 
O6 C6 C7 122.32(19) . . ? 
N2 C6 C7 114.07(16) . . ? 
C7 C7 C6 113.2(2) 3_665 . ? 
 
_diffrn_measured_fraction_theta_max    1.000 
_diffrn_reflns_theta_full              24.95 
_diffrn_measured_fraction_theta_full   1.000 
_refine_diff_density_max    0.165 
_refine_diff_density_min   -0.229 
_refine_diff_density_rms    0.051 
#end
data_4b
 
_audit_creation_method            SHELXL-97 
_chemical_name_systematic 
; 
 ? 
; 
_chemical_name_common             ? 
_chemical_melting_point           ? 
_chemical_formula_moiety          ? 
_chemical_formula_sum 
 'C16 H18 N4 O2' 
_chemical_formula_weight          298.34 
 
loop_ 
 _atom_type_symbol 
 _atom_type_description 
 _atom_type_scat_dispersion_real 
 _atom_type_scat_dispersion_imag 
 _atom_type_scat_source 
 'C'  'C'   0.0033   0.0016 
 'International Tables Vol C Tables 4.2.6.8 and 6.1.1.4' 
 'H'  'H'   0.0000   0.0000 
 'International Tables Vol C Tables 4.2.6.8 and 6.1.1.4' 
 'N'  'N'   0.0061   0.0033 
 'International Tables Vol C Tables 4.2.6.8 and 6.1.1.4' 
 'O'  'O'   0.0106   0.0060 
 'International Tables Vol C Tables 4.2.6.8 and 6.1.1.4' 
 
_symmetry_cell_setting            Monoclinic 
_symmetry_space_group_name_H-M    P2(1)/n 
 
loop_ 
 _symmetry_equiv_pos_as_xyz 
 'x, y, z' 
 '-x+1/2, y+1/2, -z+1/2' 
 '-x, -y, -z' 
 'x-1/2, -y-1/2, z-1/2' 
 
_cell_length_a                    9.4840(19) 
_cell_length_b                    7.7720(16) 
_cell_length_c                    10.702(2) 
_cell_angle_alpha                 90.00 
_cell_angle_beta                  108.21(3) 
_cell_angle_gamma                 90.00 
_cell_volume                      749.4(3) 
_cell_formula_units_Z             2 
_cell_measurement_temperature     293(2) 
_cell_measurement_reflns_used     25 
_cell_measurement_theta_min       8 
_cell_measurement_theta_max       12 
 
_exptl_crystal_description        needle 
_exptl_crystal_colour             white 
_exptl_crystal_size_max           0.18
_exptl_crystal_size_mid           0.14 
_exptl_crystal_size_min           0.12 
_exptl_crystal_density_meas       'not measured' 
_exptl_crystal_density_diffrn     1.322 
_exptl_crystal_density_method     'not measured' 
_exptl_crystal_F_000              316 
_exptl_absorpt_coefficient_mu     0.090 
_exptl_absorpt_correction_type    none 
_exptl_absorpt_correction_T_min   ? 
_exptl_absorpt_correction_T_max   ? 
_exptl_absorpt_process_details    ? 
 
_exptl_special_details 
; 
 ? 
; 
 
_diffrn_ambient_temperature       293(2) 
_diffrn_radiation_wavelength      0.71073 
_diffrn_radiation_type            MoK\a 
_diffrn_radiation_source          'fine-focus sealed tube' 
_diffrn_radiation_monochromator   graphite 
_diffrn_measurement_device_type   CAD4 
_diffrn_measurement_method        \w-scan 
_diffrn_detector_area_resol_mean  ? 
_diffrn_standards_number          3 
_diffrn_standards_interval_count  ? 
_diffrn_standards_interval_time   60 
_diffrn_standards_decay_%         0 
_diffrn_reflns_number             1398 
_diffrn_reflns_av_R_equivalents   0.0156 
_diffrn_reflns_av_sigmaI/netI     0.0397 
_diffrn_reflns_limit_h_min        -11 
_diffrn_reflns_limit_h_max        0 
_diffrn_reflns_limit_k_min        0 
_diffrn_reflns_limit_k_max        9 
_diffrn_reflns_limit_l_min        -12 
_diffrn_reflns_limit_l_max        12 
_diffrn_reflns_theta_min          2.51 
_diffrn_reflns_theta_max          24.98 
_reflns_number_total              1314 
_reflns_number_gt                 986 
_reflns_threshold_expression      >2sigma(I) 
 
_computing_data_collection        ? 
_computing_cell_refinement        ? 
_computing_data_reduction         ? 
_computing_structure_solution     'SHELXS-97 (Sheldrick, 1990)' 
_computing_structure_refinement   'SHELXL-97 (Sheldrick, 1997)' 
_computing_molecular_graphics     ? 
_computing_publication_material   ? 
 
_refine_special_details 
; 
 Refinement of F^2^ against ALL reflections.  The weighted R-factor wR and 
 goodness of fit S are based on F^2^, conventional R-factors R are based 
 on F, with F set to zero for negative F^2^. The threshold expression of 
 F^2^ > 2sigma(F^2^) is used only for calculating R-factors(gt) etc. and is 
 not relevant to the choice of reflections for refinement.  R-factors based 
 on F^2^ are statistically about twice as large as those based on F, and R- 
 factors based on ALL data will be even larger. 
; 
 
_refine_ls_structure_factor_coef  Fsqd  
_refine_ls_matrix_type            full 
_refine_ls_weighting_scheme       calc  
_refine_ls_weighting_details 
 'calc w=1/[\s^2^(Fo^2^)+(0.0697P)^2^+0.3442P] where P=(Fo^2^+2Fc^2^)/3' 
_atom_sites_solution_primary      direct 
_atom_sites_solution_secondary    difmap 
_atom_sites_solution_hydrogens    geom 
_refine_ls_hydrogen_treatment     constr 
_refine_ls_extinction_method      SHELXL 
_refine_ls_extinction_coef        0.026(6) 
_refine_ls_extinction_expression 
 'Fc^*^=kFc[1+0.001xFc^2^\l^3^/sin(2\q)]^-1/4^' 
_refine_ls_number_reflns          1314 
_refine_ls_number_parameters      101 
_refine_ls_number_restraints      0 
_refine_ls_R_factor_all           0.0664 
_refine_ls_R_factor_gt            0.0437 
_refine_ls_wR_factor_ref          0.1450 
_refine_ls_wR_factor_gt           0.1149 
_refine_ls_goodness_of_fit_ref    1.004 
_refine_ls_restrained_S_all       1.004 
_refine_ls_shift/su_max           0.000 
_refine_ls_shift/su_mean          0.000 
 
loop_ 
 _atom_site_label 
 _atom_site_type_symbol 
 _atom_site_fract_x 
 _atom_site_fract_y 
 _atom_site_fract_z 
 _atom_site_U_iso_or_equiv 
 _atom_site_adp_type 
 _atom_site_occupancy 
 _atom_site_symmetry_multiplicity 
 _atom_site_calc_flag 
 _atom_site_refinement_flags 
 _atom_site_disorder_assembly 
 _atom_site_disorder_group 
N1 N 0.2227(2) 0.3442(3) -0.17780(17) 0.0567(6) Uani 1 1 d . . . 
N2 N 0.58926(18) 0.1947(2) 0.03239(16) 0.0462(5) Uani 1 1 d . . . 
H2 H 0.6281 0.1794 0.1157 0.055 Uiso 1 1 calc R . . 
O6 O 0.63074(18) 0.1502(3) -0.16319(15) 0.0700(6) Uani 1 1 d . . . 
C1 C 0.4464(2) 0.2655(3) -0.00857(19) 0.0411(5) Uani 1 1 d . . . 
C2 C 0.3579(2) 0.2723(3) -0.1387(2) 0.0513(6) Uani 1 1 d . . . 
H2A H 0.3941 0.2246 -0.2023 0.062 Uiso 1 1 calc R . . 
C3 C 0.1704(3) 0.4097(3) -0.0865(2) 0.0537(6) Uani 1 1 d . . . 
H3 H 0.0770 0.4606 -0.1127 0.064 Uiso 1 1 calc R . . 
C4 C 0.2490(3) 0.4051(4) 0.0451(2) 0.0601(7) Uani 1 1 d . . . 
H4 H 0.2086 0.4498 0.1071 0.072 Uiso 1 1 calc R . . 
C5 C 0.3881(2) 0.3332(3) 0.0836(2) 0.0548(6) Uani 1 1 d . . . 
H5 H 0.4432 0.3303 0.1723 0.066 Uiso 1 1 calc R . . 
C6 C 0.6744(2) 0.1470(3) -0.04330(19) 0.0470(6) Uani 1 1 d . . . 
C7 C 0.8289(2) 0.0929(3) 0.0362(2) 0.0515(6) Uani 1 1 d . . . 
H7A H 0.8215 0.0030 0.0967 0.062 Uiso 1 1 calc . . . 
H7B H 0.8784 0.1903 0.0884 0.062 Uiso 1 1 calc . . . 
C8 C 0.9241(2) 0.0282(3) -0.0435(2) 0.0505(6) Uani 1 1 d . . . 
H8A H 0.8749 -0.0681 -0.0972 0.061 Uiso 1 1 calc . . . 
H8B H 0.9355 0.1187 -0.1020 0.061 Uiso 1 1 calc . . . 
 
loop_ 
 _atom_site_aniso_label 
 _atom_site_aniso_U_11 
 _atom_site_aniso_U_22 
 _atom_site_aniso_U_33 
 _atom_site_aniso_U_23 
 _atom_site_aniso_U_13 
 _atom_site_aniso_U_12 
N1 0.0437(11) 0.0787(14) 0.0412(10) 0.0014(9) 0.0040(8) 0.0065(10) 
N2 0.0372(9) 0.0698(13) 0.0300(8) 0.0019(8) 0.0083(7) 0.0030(8) 
O6 0.0559(10) 0.1179(16) 0.0366(9) 0.0015(9) 0.0148(7) 0.0218(10) 
C1 0.0365(10) 0.0523(12) 0.0334(10) 0.0022(8) 0.0091(8) -0.0026(9) 
C2 0.0435(12) 0.0736(16) 0.0349(11) -0.0010(10) 0.0094(9) 0.0067(11) 
C3 0.0429(12) 0.0611(14) 0.0557(14) 0.0011(11) 0.0134(10) 0.0045(10) 
C4 0.0501(13) 0.0824(17) 0.0506(13) -0.0044(12) 0.0198(11) 0.0117(12) 
C5 0.0482(13) 0.0783(17) 0.0359(11) -0.0055(11) 0.0103(9) 0.0049(11) 
C6 0.0431(12) 0.0641(14) 0.0356(11) 0.0016(9) 0.0148(9) 0.0032(10) 
C7 0.0395(11) 0.0732(15) 0.0429(12) 0.0028(11) 0.0143(9) 0.0034(11) 
C8 0.0392(12) 0.0686(15) 0.0466(12) 0.0025(10) 0.0176(9) 0.0003(10) 
 
_geom_special_details 
; 
 All esds (except the esd in the dihedral angle between two l.s. planes) 
 are estimated using the full covariance matrix.  The cell esds are taken 
 into account individually in the estimation of esds in distances, angles 
 and torsion angles; correlations between esds in cell parameters are only 
 used when they are defined by crystal symmetry.  An approximate (isotropic) 
 treatment of cell esds is used for estimating esds involving l.s. planes. 
; 
 
loop_ 
 _geom_bond_atom_site_label_1 
 _geom_bond_atom_site_label_2 
 _geom_bond_distance 
 _geom_bond_site_symmetry_2 
 _geom_bond_publ_flag 
N1 C3 1.327(3) . ? 
N1 C2 1.340(3) . ? 
N2 C6 1.361(3) . ? 
N2 C1 1.400(3) . ? 
O6 C6 1.219(2) . ? 
C1 C5 1.378(3) . ? 
C1 C2 1.385(3) . ? 
C3 C4 1.373(3) . ? 
C4 C5 1.372(3) . ? 
C6 C7 1.507(3) . ? 
C7 C8 1.510(3) . ? 
C8 C8 1.515(4) 3_755 ? 
 
loop_ 
 _geom_angle_atom_site_label_1 
 _geom_angle_atom_site_label_2 
 _geom_angle_atom_site_label_3 
 _geom_angle 
 _geom_angle_site_symmetry_1 
 _geom_angle_site_symmetry_3 
 _geom_angle_publ_flag 
C3 N1 C2 118.10(19) . . ? 
C6 N2 C1 128.05(17) . . ? 
C5 C1 C2 116.90(19) . . ? 
C5 C1 N2 119.48(17) . . ? 
C2 C1 N2 123.62(19) . . ? 
N1 C2 C1 123.4(2) . . ? 
N1 C3 C4 122.5(2) . . ? 
C5 C4 C3 118.8(2) . . ? 
C4 C5 C1 120.29(19) . . ? 
O6 C6 N2 123.5(2) . . ? 
O6 C6 C7 123.39(19) . . ? 
N2 C6 C7 113.12(17) . . ? 
C6 C7 C8 114.93(18) . . ? 
C8 C8 C7 111.7(2) 3_755 . ? 
 
_diffrn_measured_fraction_theta_max    0.997 
_diffrn_reflns_theta_full              24.98 
_diffrn_measured_fraction_theta_full   0.997 
_refine_diff_density_max    0.160 
_refine_diff_density_min   -0.186 
_refine_diff_density_rms    0.042 
#END
data_4c
 
_audit_creation_method            SHELXL-97 
_chemical_name_systematic 
; 
 ? 
; 
_chemical_name_common             ? 
_chemical_melting_point           ? 
_chemical_formula_moiety          ? 
_chemical_formula_sum 
 'C18 H22 N4 O2' 
_chemical_formula_weight          326.40 
 
loop_ 
 _atom_type_symbol 
 _atom_type_description 
 _atom_type_scat_dispersion_real 
 _atom_type_scat_dispersion_imag 
 _atom_type_scat_source 
 'C'  'C'   0.0033   0.0016 
 'International Tables Vol C Tables 4.2.6.8 and 6.1.1.4' 
 'H'  'H'   0.0000   0.0000 
 'International Tables Vol C Tables 4.2.6.8 and 6.1.1.4' 
 'N'  'N'   0.0061   0.0033 
 'International Tables Vol C Tables 4.2.6.8 and 6.1.1.4' 
 'O'  'O'   0.0106   0.0060 
 'International Tables Vol C Tables 4.2.6.8 and 6.1.1.4' 
 
_symmetry_cell_setting            Triclinic
_symmetry_space_group_name_H-M    P-1 
 
loop_ 
 _symmetry_equiv_pos_as_xyz 
 'x, y, z' 
 '-x, -y, -z' 
 
_cell_length_a                    8.2247(16) 
_cell_length_b                    9.6843(19) 
_cell_length_c                    21.939(4) 
_cell_angle_alpha                 96.00(3) 
_cell_angle_beta                  96.18(3) 
_cell_angle_gamma                 105.83(3) 
_cell_volume                      1654.9(6) 
_cell_formula_units_Z             4 
_cell_measurement_temperature     293(2) 
_cell_measurement_reflns_used     25 
_cell_measurement_theta_min       8 
_cell_measurement_theta_max       11 
 
_exptl_crystal_description        needle 
_exptl_crystal_colour             colorless 
_exptl_crystal_size_max           0.16 
_exptl_crystal_size_mid           0.12 
_exptl_crystal_size_min           0.11 
_exptl_crystal_density_meas       'not measured'
_exptl_crystal_density_diffrn     1.310 
_exptl_crystal_density_method     'not measured' 
_exptl_crystal_F_000              696 
_exptl_absorpt_coefficient_mu     0.088 
_exptl_absorpt_correction_type    none 
_exptl_absorpt_correction_T_min   ? 
_exptl_absorpt_correction_T_max   ? 
_exptl_absorpt_process_details    ? 
 
_exptl_special_details 
; 
 ? 
; 
 
_diffrn_ambient_temperature       293(2) 
_diffrn_radiation_wavelength      0.71073 
_diffrn_radiation_type            MoK\a 
_diffrn_radiation_source          'fine-focus sealed tube' 
_diffrn_radiation_monochromator   graphite 
_diffrn_measurement_device_type   CAD4 
_diffrn_measurement_method        \w-scan 
_diffrn_detector_area_resol_mean  ? 
_diffrn_standards_number          3 
_diffrn_standards_interval_count  ? 
_diffrn_standards_interval_time   60 
_diffrn_standards_decay_%         0 
_diffrn_reflns_number             6137 
_diffrn_reflns_av_R_equivalents   0.0490 
_diffrn_reflns_av_sigmaI/netI     0.1070 
_diffrn_reflns_limit_h_min        0 
_diffrn_reflns_limit_h_max        9 
_diffrn_reflns_limit_k_min        -11 
_diffrn_reflns_limit_k_max        11 
_diffrn_reflns_limit_l_min        -26 
_diffrn_reflns_limit_l_max        25 
_diffrn_reflns_theta_min          1.89 
_diffrn_reflns_theta_max          24.98 
_reflns_number_total              5693 
_reflns_number_gt                 2590 
_reflns_threshold_expression      >2sigma(I) 
 
_computing_data_collection        CAD4 
_computing_cell_refinement        CAD4 
_computing_data_reduction         CAD4 
_computing_structure_solution     'SHELXS-97 (Sheldrick, 1990)' 
_computing_structure_refinement   'SHELXL-97 (Sheldrick, 1997)' 
_computing_molecular_graphics     ? 
_computing_publication_material   ? 
 
_refine_special_details 
; 
 Refinement of F^2^ against ALL reflections.  The weighted R-factor wR and 
 goodness of fit S are based on F^2^, conventional R-factors R are based 
 on F, with F set to zero for negative F^2^. The threshold expression of 
 F^2^ > 2sigma(F^2^) is used only for calculating R-factors(gt) etc. and is 
 not relevant to the choice of reflections for refinement.  R-factors based 
 on F^2^ are statistically about twice as large as those based on F, and R- 
 factors based on ALL data will be even larger. 
; 
 
_refine_ls_structure_factor_coef  Fsqd  
_refine_ls_matrix_type            full 
_refine_ls_weighting_scheme       calc  
_refine_ls_weighting_details 
 'calc w=1/[\s^2^(Fo^2^)+(0.0601P)^2^+0.0000P] where P=(Fo^2^+2Fc^2^)/3' 
_atom_sites_solution_primary      direct 
_atom_sites_solution_secondary    difmap 
_atom_sites_solution_hydrogens    geom 
_refine_ls_hydrogen_treatment     constr 
_refine_ls_extinction_method      SHELXL 
_refine_ls_extinction_coef        0.0096(10) 
_refine_ls_extinction_expression 
 'Fc^*^=kFc[1+0.001xFc^2^\l^3^/sin(2\q)]^-1/4^' 
_refine_ls_number_reflns          5693 
_refine_ls_number_parameters      434 
_refine_ls_number_restraints      0 
_refine_ls_R_factor_all           0.1783 
_refine_ls_R_factor_gt            0.0560 
_refine_ls_wR_factor_ref          0.1479 
_refine_ls_wR_factor_gt           0.1132 
_refine_ls_goodness_of_fit_ref    0.971 
_refine_ls_restrained_S_all       0.971 
_refine_ls_shift/su_max           0.000 
_refine_ls_shift/su_mean          0.000 
 
loop_ 
 _atom_site_label 
 _atom_site_type_symbol 
 _atom_site_fract_x 
 _atom_site_fract_y 
 _atom_site_fract_z 
 _atom_site_U_iso_or_equiv 
 _atom_site_adp_type 
 _atom_site_occupancy 
 _atom_site_symmetry_multiplicity 
 _atom_site_calc_flag 
 _atom_site_refinement_flags 
 _atom_site_disorder_assembly 
 _atom_site_disorder_group 
N11A N 1.3877(3) 0.2560(3) 0.42022(12) 0.0487(8) Uani 1 1 d . . . 
N12A N 1.0480(3) 0.2619(3) 0.29842(11) 0.0407(7) Uani 1 1 d . . . 
H12A H 0.9702 0.3059 0.2984 0.049 Uiso 1 1 calc R . . 
C11A C 1.1330(4) 0.2557(3) 0.35637(14) 0.0348(8) Uani 1 1 d . . . 
C12A C 1.3040(4) 0.2613(3) 0.36571(15) 0.0425(9) Uani 1 1 d . . . 
H12B H 1.3636 0.2692 0.3319 0.051 Uiso 1 1 calc R . . 
C13A C 1.3005(5) 0.2453(4) 0.46779(16) 0.0522(10) Uani 1 1 d . . . 
H13A H 1.3563 0.2383 0.5060 0.063 Uiso 1 1 calc R . . 
C14A C 1.1325(5) 0.2440(4) 0.46369(15) 0.0532(10) Uani 1 1 d . . . 
H14A H 1.0776 0.2404 0.4987 0.064 Uiso 1 1 calc R . . 
C15A C 1.0468(4) 0.2482(3) 0.40694(15) 0.0451(9) Uani 1 1 d . . . 
H15A H 0.9324 0.2459 0.4027 0.054 Uiso 1 1 calc R . . 
N21A N 0.2154(4) 0.0760(3) -0.31137(13) 0.0455(8) Uani 1 1 d . . . 
N22A N 0.5561(4) 0.0106(3) -0.20429(12) 0.0467(8) Uani 1 1 d . . . 
H22A H 0.6203 -0.0457 -0.2083 0.056 Uiso 1 1 calc R . . 
C21A C 0.4619(4) 0.0280(3) -0.25905(14) 0.0356(8) Uani 1 1 d . . . 
C22A C 0.3082(4) 0.0622(4) -0.25982(15) 0.0458(9) Uani 1 1 d . . . 
H22B H 0.2678 0.0763 -0.2223 0.055 Uiso 1 1 calc R . . 
C23A C 0.2758(4) 0.0554(3) -0.36457(15) 0.0462(9) Uani 1 1 d . . . 
H23A H 0.2128 0.0640 -0.4011 0.055 Uiso 1 1 calc R . . 
C24A C 0.4263(4) 0.0221(4) -0.36794(15) 0.0491(9) Uani 1 1 d . . . 
H24A H 0.4648 0.0097 -0.4059 0.059 Uiso 1 1 calc R . . 
C25A C 0.5194(4) 0.0073(3) -0.31452(15) 0.0452(9) Uani 1 1 d . . . 
H25A H 0.6211 -0.0166 -0.3160 0.054 Uiso 1 1 calc R . . 
C31A C 1.0746(4) 0.2061(4) 0.24224(15) 0.0421(9) Uani 1 1 d . . . 
C32A C 0.9636(5) 0.2351(4) 0.18896(15) 0.0485(10) Uani 1 1 d . . . 
H32A H 1.0082 0.3358 0.1833 0.058 Uiso 1 1 calc . . . 
H32B H 0.8501 0.2224 0.2002 0.058 Uiso 1 1 calc . . . 
C33A C 0.9478(4) 0.1425(3) 0.12791(14) 0.0429(9) Uani 1 1 d . . . 
H33A H 0.8995 0.0415 0.1325 0.052 Uiso 1 1 calc . . . 
H33B H 1.0607 0.1535 0.1162 0.052 Uiso 1 1 calc . . . 
C34A C 0.8361(4) 0.1823(4) 0.07670(15) 0.0465(9) Uani 1 1 d . . . 
H34A H 0.7266 0.1785 0.0901 0.056 Uiso 1 1 calc . . . 
H34B H 0.8892 0.2814 0.0706 0.056 Uiso 1 1 calc . . . 
C35A C 0.8061(4) 0.0862(4) 0.01575(15) 0.0457(9) Uani 1 1 d . . . 
H35A H 0.7510 -0.0127 0.0215 0.055 Uiso 1 1 calc . . . 
H35B H 0.9156 0.0887 0.0025 0.055 Uiso 1 1 calc . . . 
C36A C 0.6970(4) 0.1292(4) -0.03502(15) 0.0447(9) Uani 1 1 d . . . 
H36A H 0.5870 0.1255 -0.0220 0.054 Uiso 1 1 calc . . . 
H36B H 0.7514 0.2286 -0.0404 0.054 Uiso 1 1 calc . . . 
C37A C 0.6686(4) 0.0343(4) -0.09637(15) 0.0467(9) Uani 1 1 d . . . 
H37A H 0.7784 0.0406 -0.1100 0.056 Uiso 1 1 calc . . . 
H37B H 0.6179 -0.0655 -0.0906 0.056 Uiso 1 1 calc . . . 
C38A C 0.5564(5) 0.0730(4) -0.14601(15) 0.0438(9) Uani 1 1 d . . . 
O31A O 1.1808(3) 0.1409(3) 0.23582(10) 0.0603(7) Uani 1 1 d . . . 
O38A O 0.4707(4) 0.1551(3) -0.13552(11) 0.0774(9) Uani 1 1 d . . . 
N11B N 1.2274(4) 0.8726(3) 0.46804(12) 0.0513(8) Uani 1 1 d . . . 
N12B N 1.0523(3) 0.7649(3) 0.30454(11) 0.0413(7) Uani 1 1 d . . . 
H12C H 0.9805 0.8149 0.3044 0.050 Uiso 1 1 calc R . . 
C11B C 1.1348(4) 0.7563(3) 0.36286(14) 0.0372(8) Uani 1 1 d . . . 
C12B C 1.1559(4) 0.8680(4) 0.41036(15) 0.0442(9) Uani 1 1 d . . . 
H12D H 1.1169 0.9461 0.4012 0.053 Uiso 1 1 calc R . . 
C13B C 1.2830(4) 0.7595(4) 0.47955(16) 0.0521(10) Uani 1 1 d . . . 
H13B H 1.3337 0.7591 0.5195 0.063 Uiso 1 1 calc R . . 
C14B C 1.2691(4) 0.6438(4) 0.43550(16) 0.0515(10) Uani 1 1 d . . . 
H14B H 1.3104 0.5676 0.4457 0.062 Uiso 1 1 calc R . . 
C15B C 1.1935(4) 0.6414(3) 0.37617(15) 0.0460(9) Uani 1 1 d . . . 
H15B H 1.1824 0.5637 0.3457 0.055 Uiso 1 1 calc R . . 
N21B N 0.2488(4) 0.6078(3) -0.30669(13) 0.0548(9) Uani 1 1 d . . . 
N22B N 0.5524(4) 0.5035(3) -0.19729(12) 0.0498(8) Uani 1 1 d . . . 
H22C H 0.6193 0.4497 -0.2012 0.060 Uiso 1 1 calc R . . 
C21B C 0.4511(4) 0.5112(3) -0.25149(15) 0.0404(9) Uani 1 1 d . . . 
C22B C 0.3455(5) 0.6013(4) -0.25518(16) 0.0544(11) Uani 1 1 d . . . 
H22D H 0.3425 0.6607 -0.2194 0.065 Uiso 1 1 calc R . . 
C23B C 0.2564(4) 0.5242(4) -0.35713(16) 0.0509(10) Uani 1 1 d . . . 
H23B H 0.1901 0.5277 -0.3937 0.061 Uiso 1 1 calc R . . 
C24B C 0.3567(4) 0.4326(4) -0.35840(15) 0.0521(10) Uani 1 1 d . . . 
H24B H 0.3584 0.3760 -0.3951 0.062 Uiso 1 1 calc R . . 
C25B C 0.4549(4) 0.4253(4) -0.30478(15) 0.0454(9) Uani 1 1 d . . . 
H25B H 0.5231 0.3629 -0.3046 0.054 Uiso 1 1 calc R . . 
O38B O 0.4746(4) 0.6531(3) -0.12828(11) 0.0724(9) Uani 1 1 d . . . 
O31B O 1.1720(3) 0.6311(3) 0.24211(10) 0.0584(7) Uani 1 1 d . . . 
C31B C 1.0726(4) 0.7041(4) 0.24867(15) 0.0411(9) Uani 1 1 d . . . 
C32B C 0.9642(4) 0.7358(4) 0.19555(15) 0.0467(10) Uani 1 1 d . . . 
H32C H 0.8511 0.7260 0.2067 0.056 Uiso 1 1 calc . . . 
H32D H 1.0121 0.8359 0.1897 0.056 Uiso 1 1 calc . . . 
C33B C 0.9466(4) 0.6417(4) 0.13500(15) 0.0453(9) Uani 1 1 d . . . 
H33C H 0.8945 0.5415 0.1398 0.054 Uiso 1 1 calc . . . 
H33D H 1.0592 0.6492 0.1237 0.054 Uiso 1 1 calc . . . 
C34B C 0.8395(4) 0.6831(4) 0.08322(15) 0.0461(9) Uani 1 1 d . . . 
H34C H 0.7303 0.6828 0.0962 0.055 Uiso 1 1 calc . . . 
H34D H 0.8962 0.7813 0.0769 0.055 Uiso 1 1 calc . . . 
C35B C 0.8077(4) 0.5853(4) 0.02236(14) 0.0469(10) Uani 1 1 d . . . 
H35C H 0.7503 0.4871 0.0285 0.056 Uiso 1 1 calc . . . 
H35D H 0.9167 0.5853 0.0093 0.056 Uiso 1 1 calc . . . 
C36B C 0.7013(4) 0.6286(4) -0.02877(15) 0.0451(9) Uani 1 1 d . . . 
H36C H 0.5917 0.6275 -0.0160 0.054 Uiso 1 1 calc . . . 
H36D H 0.7580 0.7271 -0.0347 0.054 Uiso 1 1 calc . . . 
C37B C 0.6715(4) 0.5308(4) -0.08972(15) 0.0470(9) Uani 1 1 d . . . 
H37C H 0.7807 0.5358 -0.1037 0.056 Uiso 1 1 calc . . . 
H37D H 0.6200 0.4316 -0.0834 0.056 Uiso 1 1 calc . . . 
C38B C 0.5580(5) 0.5704(4) -0.13942(15) 0.0446(9) Uani 1 1 d . . . 
 
loop_ 
 _atom_site_aniso_label 
 _atom_site_aniso_U_11 
 _atom_site_aniso_U_22 
 _atom_site_aniso_U_33 
 _atom_site_aniso_U_23 
 _atom_site_aniso_U_13 
 _atom_site_aniso_U_12 
N11A 0.0464(19) 0.066(2) 0.0343(17) 0.0020(15) 0.0005(15) 0.0200(16) 
N12A 0.0454(18) 0.0492(18) 0.0347(17) 0.0025(14) -0.0012(14) 0.0296(15) 
C11A 0.038(2) 0.034(2) 0.0342(19) 0.0018(15) 0.0025(16) 0.0160(17) 
C12A 0.041(2) 0.050(2) 0.036(2) 0.0064(17) 0.0065(17) 0.0135(18) 
C13A 0.056(3) 0.065(3) 0.034(2) 0.0034(18) -0.0052(19) 0.021(2) 
C14A 0.056(3) 0.072(3) 0.034(2) 0.0054(18) 0.0072(18) 0.021(2) 
C15A 0.041(2) 0.051(2) 0.044(2) -0.0005(17) 0.0059(17) 0.0174(18) 
N21A 0.0456(19) 0.0562(19) 0.0398(17) 0.0074(14) 0.0041(15) 0.0235(16) 
N22A 0.054(2) 0.058(2) 0.0364(17) -0.0027(14) -0.0007(15) 0.0366(17) 
C21A 0.037(2) 0.035(2) 0.036(2) 0.0002(15) 0.0023(16) 0.0144(17) 
C22A 0.044(2) 0.057(2) 0.042(2) 0.0078(18) 0.0079(18) 0.023(2) 
C23A 0.050(2) 0.049(2) 0.038(2) 0.0065(17) -0.0009(18) 0.0137(19) 
C24A 0.052(2) 0.056(2) 0.040(2) -0.0022(18) 0.0082(18) 0.019(2) 
C25A 0.042(2) 0.050(2) 0.048(2) 0.0034(18) 0.0049(18) 0.0216(19) 
C31A 0.044(2) 0.043(2) 0.042(2) 0.0014(17) 0.0058(18) 0.0191(19) 
C32A 0.060(3) 0.055(2) 0.040(2) 0.0014(18) -0.0002(18) 0.036(2) 
C33A 0.050(2) 0.045(2) 0.038(2) 0.0037(16) 0.0036(17) 0.0210(19) 
C34A 0.052(2) 0.054(2) 0.041(2) 0.0053(17) -0.0002(17) 0.030(2) 
C35A 0.051(2) 0.050(2) 0.042(2) 0.0028(17) 0.0015(18) 0.027(2) 
C36A 0.048(2) 0.048(2) 0.040(2) -0.0010(17) 0.0000(17) 0.0229(19) 
C37A 0.049(2) 0.054(2) 0.041(2) 0.0025(18) 0.0008(17) 0.025(2) 
C38A 0.049(2) 0.045(2) 0.039(2) -0.0042(17) -0.0010(18) 0.023(2) 
O31A 0.0663(18) 0.0837(19) 0.0450(15) -0.0032(13) 0.0018(13) 0.0515(16) 
O38A 0.098(2) 0.098(2) 0.0513(17) -0.0203(15) -0.0138(15) 0.074(2) 
N11B 0.054(2) 0.066(2) 0.0350(17) 0.0028(15) -0.0029(15) 0.0237(17) 
N12B 0.0431(18) 0.0515(19) 0.0351(17) 0.0025(14) 0.0012(14) 0.0259(15) 
C11B 0.030(2) 0.044(2) 0.037(2) 0.0070(17) 0.0032(16) 0.0096(17) 
C12B 0.039(2) 0.055(2) 0.043(2) 0.0047(18) 0.0052(17) 0.0218(18) 
C13B 0.047(2) 0.072(3) 0.041(2) 0.015(2) 0.0020(18) 0.023(2) 
C14B 0.051(2) 0.056(2) 0.054(2) 0.015(2) -0.0001(19) 0.024(2) 
C15B 0.051(2) 0.040(2) 0.048(2) 0.0025(17) 0.0001(18) 0.0163(18) 
N21B 0.056(2) 0.071(2) 0.0454(18) 0.0014(16) -0.0030(16) 0.0386(18) 
N22B 0.057(2) 0.059(2) 0.0437(18) -0.0050(15) -0.0048(15) 0.0418(17) 
C21B 0.042(2) 0.042(2) 0.039(2) 0.0020(17) 0.0025(17) 0.0177(18) 
C22B 0.064(3) 0.063(3) 0.044(2) -0.0040(19) -0.002(2) 0.039(2) 
C23B 0.050(2) 0.058(2) 0.044(2) 0.0057(19) -0.0066(18) 0.018(2) 
C24B 0.056(2) 0.057(3) 0.040(2) -0.0071(18) -0.0034(19) 0.021(2) 
C25B 0.045(2) 0.047(2) 0.047(2) -0.0028(17) 0.0046(18) 0.0206(19) 
O38B 0.096(2) 0.093(2) 0.0454(16) -0.0123(14) -0.0079(15) 0.0708(19) 
O31B 0.0645(18) 0.0764(18) 0.0464(15) -0.0013(13) -0.0008(13) 0.0475(16) 
C31B 0.039(2) 0.048(2) 0.039(2) 0.0032(17) 0.0017(17) 0.0181(19) 
C32B 0.051(2) 0.052(2) 0.040(2) 0.0008(17) 0.0030(18) 0.024(2) 
C33B 0.050(2) 0.051(2) 0.039(2) 0.0004(17) 0.0010(17) 0.027(2) 
C34B 0.054(2) 0.049(2) 0.041(2) 0.0024(17) 0.0064(18) 0.025(2) 
C35B 0.055(2) 0.051(2) 0.036(2) -0.0016(17) -0.0020(17) 0.025(2) 
C36B 0.049(2) 0.048(2) 0.040(2) -0.0019(17) -0.0002(17) 0.0222(19) 
C37B 0.053(2) 0.046(2) 0.046(2) -0.0002(18) -0.0014(18) 0.0274(19) 
C38B 0.051(2) 0.045(2) 0.040(2) -0.0022(17) -0.0012(18) 0.022(2) 
 
_geom_special_details 
; 
 All esds (except the esd in the dihedral angle between two l.s. planes) 
 are estimated using the full covariance matrix.  The cell esds are taken 
 into account individually in the estimation of esds in distances, angles 
 and torsion angles; correlations between esds in cell parameters are only 
 used when they are defined by crystal symmetry.  An approximate (isotropic) 
 treatment of cell esds is used for estimating esds involving l.s. planes. 
; 
 
loop_ 
 _geom_bond_atom_site_label_1 
 _geom_bond_atom_site_label_2 
 _geom_bond_distance 
 _geom_bond_site_symmetry_2 
 _geom_bond_publ_flag 
N11A C12A 1.327(4) . ? 
N11A C13A 1.326(4) . ? 
N12A C31A 1.357(4) . ? 
N12A C11A 1.399(4) . ? 
C11A C15A 1.377(4) . ? 
C11A C12A 1.385(4) . ? 
C13A C14A 1.371(5) . ? 
C14A C15A 1.373(4) . ? 
N21A C23A 1.334(4) . ? 
N21A C22A 1.334(4) . ? 
N22A C38A 1.356(4) . ? 
N22A C21A 1.409(4) . ? 
C21A C25A 1.367(4) . ? 
C21A C22A 1.391(4) . ? 
C23A C24A 1.369(4) . ? 
C24A C25A 1.372(4) . ? 
C31A O31A 1.221(4) . ? 
C31A C32A 1.502(5) . ? 
C32A C33A 1.504(4) . ? 
C33A C34A 1.522(4) . ? 
C34A C35A 1.503(4) . ? 
C35A C36A 1.519(4) . ? 
C36A C37A 1.506(4) . ? 
C37A C38A 1.496(4) . ? 
C38A O38A 1.218(4) . ? 
N11B C12B 1.328(4) . ? 
N11B C13B 1.333(4) . ? 
N12B C31B 1.350(4) . ? 
N12B C11B 1.404(4) . ? 
C11B C15B 1.374(4) . ? 
C11B C12B 1.382(4) . ? 
C13B C14B 1.372(4) . ? 
C14B C15B 1.376(4) . ? 
N21B C23B 1.319(4) . ? 
N21B C22B 1.327(4) . ? 
N22B C38B 1.354(4) . ? 
N22B C21B 1.397(4) . ? 
C21B C25B 1.370(4) . ? 
C21B C22B 1.392(4) . ? 
C23B C24B 1.365(4) . ? 
C24B C25B 1.373(4) . ? 
O38B C38B 1.211(4) . ? 
O31B C31B 1.229(4) . ? 
C31B C32B 1.499(5) . ? 
C32B C33B 1.499(4) . ? 
C33B C34B 1.517(4) . ? 
C34B C35B 1.508(4) . ? 
C35B C36B 1.512(4) . ? 
C36B C37B 1.511(4) . ? 
C37B C38B 1.507(4) . ? 
 
loop_ 
 _geom_angle_atom_site_label_1 
 _geom_angle_atom_site_label_2 
 _geom_angle_atom_site_label_3 
 _geom_angle 
 _geom_angle_site_symmetry_1 
 _geom_angle_site_symmetry_3 
 _geom_angle_publ_flag 
C12A N11A C13A 117.2(3) . . ? 
C31A N12A C11A 127.2(3) . . ? 
C15A C11A C12A 117.9(3) . . ? 
C15A C11A N12A 119.6(3) . . ? 
C12A C11A N12A 122.5(3) . . ? 
N11A C12A C11A 123.6(3) . . ? 
N11A C13A C14A 123.6(3) . . ? 
C13A C14A C15A 118.7(3) . . ? 
C14A C15A C11A 119.0(3) . . ? 
C23A N21A C22A 117.1(3) . . ? 
C38A N22A C21A 126.9(3) . . ? 
C25A C21A C22A 117.5(3) . . ? 
C25A C21A N22A 119.7(3) . . ? 
C22A C21A N22A 122.8(3) . . ? 
N21A C22A C21A 123.6(3) . . ? 
N21A C23A C24A 123.0(3) . . ? 
C23A C24A C25A 119.0(3) . . ? 
C21A C25A C24A 119.7(3) . . ? 
O31A C31A N12A 123.0(3) . . ? 
O31A C31A C32A 123.4(3) . . ? 
N12A C31A C32A 113.6(3) . . ? 
C31A C32A C33A 116.3(3) . . ? 
C32A C33A C34A 112.3(3) . . ? 
C35A C34A C33A 114.4(3) . . ? 
C34A C35A C36A 113.6(3) . . ? 
C37A C36A C35A 113.7(3) . . ? 
C38A C37A C36A 114.0(3) . . ? 
O38A C38A N22A 121.6(3) . . ? 
O38A C38A C37A 123.0(3) . . ? 
N22A C38A C37A 115.4(3) . . ? 
C12B N11B C13B 116.0(3) . . ? 
C31B N12B C11B 127.7(3) . . ? 
C15B C11B C12B 117.5(3) . . ? 
C15B C11B N12B 123.9(3) . . ? 
C12B C11B N12B 118.6(3) . . ? 
N11B C12B C11B 125.1(3) . . ? 
N11B C13B C14B 123.4(3) . . ? 
C13B C14B C15B 119.5(3) . . ? 
C11B C15B C14B 118.6(3) . . ? 
C23B N21B C22B 117.1(3) . . ? 
C38B N22B C21B 128.0(3) . . ? 
C25B C21B C22B 117.2(3) . . ? 
C25B C21B N22B 118.7(3) . . ? 
C22B C21B N22B 124.1(3) . . ? 
N21B C22B C21B 124.0(3) . . ? 
N21B C23B C24B 123.4(3) . . ? 
C23B C24B C25B 119.2(3) . . ? 
C21B C25B C24B 119.1(3) . . ? 
O31B C31B N12B 123.0(3) . . ? 
O31B C31B C32B 123.3(3) . . ? 
N12B C31B C32B 113.7(3) . . ? 
C33B C32B C31B 115.7(3) . . ? 
C32B C33B C34B 112.6(3) . . ? 
C35B C34B C33B 114.6(3) . . ? 
C34B C35B C36B 113.9(3) . . ? 
C37B C36B C35B 113.5(3) . . ? 
C38B C37B C36B 113.0(3) . . ? 
O38B C38B N22B 122.4(3) . . ? 
O38B C38B C37B 122.6(3) . . ? 
N22B C38B C37B 115.0(3) . . ? 
 
_diffrn_measured_fraction_theta_max    0.979 
_diffrn_reflns_theta_full              24.98 
_diffrn_measured_fraction_theta_full   0.979 
_refine_diff_density_max    0.181 
_refine_diff_density_min   -0.185 
_refine_diff_density_rms    0.041 
#END
data_4d 
 
_audit_creation_method            SHELXL-97 
_chemical_name_systematic 
; 
 ? 
; 
_chemical_name_common             ? 
_chemical_melting_point           ? 
_chemical_formula_moiety          ? 
_chemical_formula_sum 
 'C20 H26 N4 O2' 
_chemical_formula_weight          354.45 
 
loop_ 
 _atom_type_symbol 
 _atom_type_description 
 _atom_type_scat_dispersion_real 
 _atom_type_scat_dispersion_imag 
 _atom_type_scat_source 
 'C'  'C'   0.0033   0.0016 
 'International Tables Vol C Tables 4.2.6.8 and 6.1.1.4' 
 'H'  'H'   0.0000   0.0000 
 'International Tables Vol C Tables 4.2.6.8 and 6.1.1.4' 
 'N'  'N'   0.0061   0.0033 
 'International Tables Vol C Tables 4.2.6.8 and 6.1.1.4' 
 'O'  'O'   0.0106   0.0060 
 'International Tables Vol C Tables 4.2.6.8 and 6.1.1.4' 
 
_symmetry_cell_setting            Triclinic 
_symmetry_space_group_name_H-M    P-1 
 
loop_ 
 _symmetry_equiv_pos_as_xyz 
 'x, y, z' 
 '-x, -y, -z' 
 
_cell_length_a                    4.8241(10) 
_cell_length_b                    8.2326(16) 
_cell_length_c                    24.212(5) 
_cell_angle_alpha                 93.71(3) 
_cell_angle_beta                  95.14(3) 
_cell_angle_gamma                 105.71(3) 
_cell_volume                      917.9(3) 
_cell_formula_units_Z             2 
_cell_measurement_temperature     293(2) 
_cell_measurement_reflns_used     25 
_cell_measurement_theta_min       8 
_cell_measurement_theta_max       12 
 
_exptl_crystal_description        needle 
_exptl_crystal_colour             colorless 
_exptl_crystal_size_max           0.17 
_exptl_crystal_size_mid           0.11 
_exptl_crystal_size_min           0.10 
_exptl_crystal_density_meas       'not measured' 
_exptl_crystal_density_diffrn     1.282 
_exptl_crystal_density_method     'not measured' 
_exptl_crystal_F_000              380 
_exptl_absorpt_coefficient_mu     0.085 
_exptl_absorpt_correction_type    none 
_exptl_absorpt_correction_T_min   ? 
_exptl_absorpt_correction_T_max   ? 
_exptl_absorpt_process_details    ? 
 
_exptl_special_details 
; 
 ? 
; 
 
_diffrn_ambient_temperature       293(2) 
_diffrn_radiation_wavelength      0.71073 
_diffrn_radiation_type            MoK\a 
_diffrn_radiation_source          'fine-focus sealed tube' 
_diffrn_radiation_monochromator   graphite 
_diffrn_measurement_device_type   CAD4 
_diffrn_measurement_method        \w-scan 
_diffrn_detector_area_resol_mean  ? 
_diffrn_standards_number          3 
_diffrn_standards_interval_count  ? 
_diffrn_standards_interval_time   60 
_diffrn_standards_decay_%         0
_diffrn_reflns_number             3636 
_diffrn_reflns_av_R_equivalents   0.0297 
_diffrn_reflns_av_sigmaI/netI     0.0739 
_diffrn_reflns_limit_h_min        0 
_diffrn_reflns_limit_h_max        5 
_diffrn_reflns_limit_k_min        -9 
_diffrn_reflns_limit_k_max        9 
_diffrn_reflns_limit_l_min        -28 
_diffrn_reflns_limit_l_max        28 
_diffrn_reflns_theta_min          1.70 
_diffrn_reflns_theta_max          24.98 
_reflns_number_total              3214 
_reflns_number_gt                 1712 
_reflns_threshold_expression      >2sigma(I) 
 
_computing_data_collection        CAD4 
_computing_cell_refinement        CAD4 
_computing_data_reduction         CAD4 
_computing_structure_solution     'SHELXS-97 (Sheldrick, 1990)' 
_computing_structure_refinement   'SHELXL-97 (Sheldrick, 1997)' 
_computing_molecular_graphics     ? 
_computing_publication_material   ? 
 
_refine_special_details 
; 
 Refinement of F^2^ against ALL reflections.  The weighted R-factor wR and 
 goodness of fit S are based on F^2^, conventional R-factors R are based 
 on F, with F set to zero for negative F^2^. The threshold expression of 
 F^2^ > 2sigma(F^2^) is used only for calculating R-factors(gt) etc. and is 
 not relevant to the choice of reflections for refinement.  R-factors based 
 on F^2^ are statistically about twice as large as those based on F, and R- 
 factors based on ALL data will be even larger. 
; 
 
_refine_ls_structure_factor_coef  Fsqd  
_refine_ls_matrix_type            full 
_refine_ls_weighting_scheme       calc  
_refine_ls_weighting_details 
 'calc w=1/[\s^2^(Fo^2^)+(0.0977P)^2^+0.0000P] where P=(Fo^2^+2Fc^2^)/3' 
_atom_sites_solution_primary      direct 
_atom_sites_solution_secondary    difmap 
_atom_sites_solution_hydrogens    geom 
_refine_ls_hydrogen_treatment     constr 
_refine_ls_extinction_method      none 
_refine_ls_extinction_coef        ? 
_refine_ls_number_reflns          3214 
_refine_ls_number_parameters      289 
_refine_ls_number_restraints      0 
_refine_ls_R_factor_all           0.1536 
_refine_ls_R_factor_gt            0.0623 
_refine_ls_wR_factor_ref          0.2067 
_refine_ls_wR_factor_gt           0.1755 
_refine_ls_goodness_of_fit_ref    1.128 
_refine_ls_restrained_S_all       1.128 
_refine_ls_shift/su_max           0.005 
_refine_ls_shift/su_mean          0.001 
 
loop_ 
 _atom_site_label 
 _atom_site_type_symbol 
 _atom_site_fract_x 
 _atom_site_fract_y 
 _atom_site_fract_z 
 _atom_site_U_iso_or_equiv 
 _atom_site_adp_type 
 _atom_site_occupancy 
 _atom_site_symmetry_multiplicity 
 _atom_site_calc_flag 
 _atom_site_refinement_flags 
 _atom_site_disorder_assembly 
 _atom_site_disorder_group 
O29 O 0.3056(6) 0.2113(3) 0.26555(10) 0.0613(8) Uani 1 1 d . . . 
O20 O 0.2849(7) -0.5676(4) -0.16945(10) 0.0778(10) Uani 1 1 d . . . 
C20 C 0.1142(8) -0.4866(4) -0.17803(15) 0.0466(9) Uani 1 1 d . . . 
C21 C 0.0302(8) -0.3820(4) -0.13275(14) 0.0489(10) Uani 1 1 d . . . 
H21A H -0.1686 -0.4355 -0.1266 0.059 Uiso 1 1 calc . . . 
H21B H 0.0384 -0.2712 -0.1451 0.059 Uiso 1 1 calc . . . 
C22 C 0.2209(8) -0.3598(4) -0.07837(14) 0.0467(9) Uani 1 1 d . . . 
H22A H 0.4178 -0.3001 -0.0840 0.056 Uiso 1 1 calc . . . 
H22B H 0.2220 -0.4707 -0.0672 0.056 Uiso 1 1 calc . . . 
C23 C 0.1256(8) -0.2633(4) -0.03185(13) 0.0468(9) Uani 1 1 d . . . 
H23A H 0.1183 -0.1540 -0.0437 0.056 Uiso 1 1 calc . . . 
H23B H -0.0692 -0.3249 -0.0256 0.056 Uiso 1 1 calc . . . 
C24 C 0.3187(8) -0.2348(4) 0.02252(14) 0.0466(10) Uani 1 1 d . . . 
H24A H 0.5140 -0.1743 0.0162 0.056 Uiso 1 1 calc . . . 
H24B H 0.3242 -0.3441 0.0346 0.056 Uiso 1 1 calc . . . 
C25 C 0.2242(8) -0.1364(4) 0.06877(13) 0.0466(9) Uani 1 1 d . . . 
H25A H 0.2184 -0.0272 0.0566 0.056 Uiso 1 1 calc . . . 
H25B H 0.0290 -0.1970 0.0751 0.056 Uiso 1 1 calc . . . 
C26 C 0.4166(8) -0.1077(4) 0.12295(14) 0.0464(9) Uani 1 1 d . . . 
H26A H 0.6125 -0.0491 0.1164 0.056 Uiso 1 1 calc . . . 
H26B H 0.4195 -0.2170 0.1354 0.056 Uiso 1 1 calc . . . 
C27 C 0.3275(8) -0.0069(4) 0.16904(14) 0.0461(9) Uani 1 1 d . . . 
H27A H 0.3411 0.1063 0.1583 0.055 Uiso 1 1 calc . . . 
H27B H 0.1267 -0.0601 0.1739 0.055 Uiso 1 1 calc . . . 
C28 C 0.5115(8) 0.0061(4) 0.22352(13) 0.0493(10) Uani 1 1 d . . . 
H28A H 0.4930 -0.1077 0.2341 0.059 Uiso 1 1 calc . . . 
H28B H 0.7123 0.0546 0.2176 0.059 Uiso 1 1 calc . . . 
C29 C 0.4450(8) 0.1089(4) 0.27158(13) 0.0430(9) Uani 1 1 d . . . 
N12 N -0.0187(6) -0.4847(4) -0.22964(11) 0.0501(8) Uani 1 1 d . . . 
H12 H -0.1336 -0.4212 -0.2324 0.060 Uiso 1 1 calc R . . 
N32 N 0.5535(6) 0.0766(3) 0.32178(10) 0.0408(8) Uani 1 1 d . . . 
H32 H 0.6462 0.0009 0.3216 0.049 Uiso 1 1 calc R . . 
C31 C 0.5319(7) 0.1528(4) 0.37406(13) 0.0372(8) Uani 1 1 d . . . 
C36 C 0.5089(10) 0.2955(5) 0.47672(16) 0.0618(12) Uani 1 1 d . . . 
H36 H 0.5056 0.3433 0.5124 0.074 Uiso 1 1 calc R A 1 
N31 N 0.5250(14) 0.3991(7) 0.4286(2) 0.0475(15) Uani 0.50 1 d P B 1 
C32 C 0.5122(16) 0.0622(9) 0.4170(3) 0.0435(17) Uani 0.50 1 d P B 1 
H32A H 0.5069 -0.0517 0.4128 0.052 Uiso 0.50 1 calc PR B 1 
C33 C 0.5425(16) 0.3213(9) 0.3801(3) 0.0422(17) Uani 0.50 1 d P B 1 
H33 H 0.5627 0.3827 0.3490 0.051 Uiso 0.50 1 calc PR B 1 
C34 C 0.500(2) 0.1401(10) 0.4681(3) 0.051(2) Uani 0.50 1 d P B 1 
H34 H 0.4833 0.0752 0.4984 0.062 Uiso 0.50 1 calc PR B 1 
N31A N 0.7535(16) 0.2310(8) 0.4714(2) 0.0503(16) Uani 0.50 1 d P B 2 
C32A C 0.7514(18) 0.1662(9) 0.4194(3) 0.0441(18) Uani 0.50 1 d P B 2 
H32B H 0.9076 0.1257 0.4119 0.053 Uiso 0.50 1 calc PR B 2 
C33A C 0.3002(17) 0.2105(9) 0.3886(3) 0.0469(18) Uani 0.50 1 d P B 2 
H33A H 0.1442 0.2028 0.3621 0.056 Uiso 0.50 1 calc PR B 2 
C34A C 0.3006(18) 0.2795(9) 0.4424(3) 0.0488(19) Uani 0.50 1 d P B 2 
H34A H 0.1417 0.3137 0.4522 0.059 Uiso 0.50 1 calc PR B 2 
N11 N 0.1562(7) -0.7937(4) -0.32790(13) 0.0586(10) Uani 1 1 d . D . 
C11 C 0.0104(8) -0.5748(4) -0.27905(13) 0.0429(9) Uani 1 1 d . . . 
C12 C 0.1297(10) -0.7056(5) -0.28142(15) 0.0675(13) Uani 1 1 d . D . 
H12A H 0.1992 -0.7368 -0.2478 0.081 Uiso 1 1 calc R . . 
C13 C 0.0621(9) -0.7502(5) -0.37430(16) 0.0593(11) Uani 1 1 d . . . 
H13 H 0.0161 -0.8296 -0.4052 0.071 Uiso 1 1 calc R C 3 
C14 C 0.0247(19) -0.5879(11) -0.3808(3) 0.046(2) Uani 0.50 1 d P D 3 
H14 H 0.0204 -0.5432 -0.4151 0.056 Uiso 0.50 1 calc PR D 3 
C15 C -0.0048(18) -0.5020(11) -0.3322(3) 0.044(2) Uani 0.50 1 d P D 3 
H15 H -0.0350 -0.3953 -0.3331 0.053 Uiso 0.50 1 calc PR D 3 
C14A C -0.153(2) -0.6604(11) -0.3719(3) 0.050(2) Uani 0.50 1 d P D 4 
H14A H -0.2801 -0.6638 -0.4034 0.060 Uiso 0.50 1 calc PR D 4 
C15A C -0.1732(19) -0.5688(11) -0.3235(3) 0.044(2) Uani 0.50 1 d P D 4 
H15A H -0.3069 -0.5063 -0.3217 0.053 Uiso 0.50 1 calc PR D 4 
 
loop_ 
 _atom_site_aniso_label 
 _atom_site_aniso_U_11 
 _atom_site_aniso_U_22 
 _atom_site_aniso_U_33 
 _atom_site_aniso_U_23 
 _atom_site_aniso_U_13 
 _atom_site_aniso_U_12 
O29 0.085(2) 0.0682(18) 0.0453(15) -0.0041(12) -0.0065(14) 0.0532(17) 
O20 0.096(2) 0.101(2) 0.0555(17) -0.0164(15) -0.0197(16) 0.075(2) 
C20 0.045(2) 0.047(2) 0.050(2) -0.0024(17) -0.0042(18) 0.0217(19) 
C21 0.054(2) 0.054(2) 0.043(2) -0.0061(17) -0.0036(18) 0.028(2) 
C22 0.050(2) 0.051(2) 0.041(2) -0.0006(16) -0.0010(17) 0.0200(19) 
C23 0.052(2) 0.052(2) 0.040(2) -0.0019(16) 0.0000(18) 0.024(2) 
C24 0.050(2) 0.051(2) 0.042(2) -0.0013(17) 0.0003(18) 0.023(2) 
C25 0.052(2) 0.050(2) 0.041(2) -0.0041(16) 0.0017(17) 0.0223(19) 
C26 0.050(2) 0.048(2) 0.043(2) -0.0041(17) -0.0005(18) 0.0205(19) 
C27 0.052(2) 0.052(2) 0.040(2) -0.0028(16) 0.0008(17) 0.027(2) 
C28 0.059(3) 0.056(2) 0.040(2) -0.0045(17) 0.0002(18) 0.032(2) 
C29 0.046(2) 0.042(2) 0.042(2) -0.0040(16) -0.0043(17) 0.0167(19) 
N12 0.058(2) 0.0593(19) 0.0428(17) -0.0095(15) -0.0067(15) 0.0395(17) 
N32 0.0508(19) 0.0429(17) 0.0352(16) -0.0023(13) 0.0000(14) 0.0266(15) 
C31 0.041(2) 0.0345(19) 0.0367(19) -0.0018(15) 0.0021(16) 0.0137(17) 
C36 0.074(3) 0.060(3) 0.048(2) -0.018(2) 0.016(2) 0.015(2) 
N31 0.062(4) 0.045(4) 0.036(3) -0.001(3) 0.002(3) 0.017(3) 
C32 0.049(5) 0.040(4) 0.042(4) 0.003(3) -0.001(4) 0.015(4) 
C33 0.051(5) 0.043(4) 0.031(4) -0.002(3) 0.001(3) 0.013(4) 
C34 0.076(6) 0.051(5) 0.031(4) 0.003(3) 0.006(4) 0.024(5) 
N31A 0.064(5) 0.051(4) 0.034(3) -0.003(3) 0.000(3) 0.016(4) 
C32A 0.056(5) 0.046(4) 0.036(4) -0.001(3) 0.002(4) 0.026(4) 
C33A 0.047(5) 0.047(4) 0.047(4) -0.005(3) -0.002(4) 0.019(4) 
C34A 0.052(5) 0.051(5) 0.047(5) -0.007(4) 0.015(4) 0.019(4) 
N11 0.083(3) 0.066(2) 0.0424(18) 0.0035(15) 0.0098(17) 0.047(2) 
C11 0.046(2) 0.045(2) 0.040(2) -0.0015(16) -0.0060(17) 0.0216(19) 
C12 0.105(4) 0.079(3) 0.043(2) 0.008(2) 0.011(2) 0.066(3) 
C13 0.076(3) 0.051(2) 0.048(2) -0.0148(18) -0.013(2) 0.026(2) 
C14 0.053(6) 0.043(5) 0.040(5) 0.006(4) 0.001(4) 0.008(4) 
C15 0.045(5) 0.038(5) 0.048(5) -0.002(4) -0.007(4) 0.016(4) 
C14A 0.058(6) 0.059(6) 0.033(5) 0.004(4) -0.008(4) 0.022(5) 
C15A 0.048(6) 0.046(5) 0.042(5) -0.003(4) 0.000(4) 0.024(4) 
 
_geom_special_details 
; 
 All esds (except the esd in the dihedral angle between two l.s. planes) 
 are estimated using the full covariance matrix.  The cell esds are taken 
 into account individually in the estimation of esds in distances, angles 
 and torsion angles; correlations between esds in cell parameters are only 
 used when they are defined by crystal symmetry.  An approximate (isotropic) 
 treatment of cell esds is used for estimating esds involving l.s. planes. 
; 
 
loop_ 
 _geom_bond_atom_site_label_1 
 _geom_bond_atom_site_label_2 
 _geom_bond_distance 
 _geom_bond_site_symmetry_2 
 _geom_bond_publ_flag 
O29 C29 1.220(4) . ? 
O20 C20 1.204(4) . ? 
C20 N12 1.356(4) . ? 
C20 C21 1.502(5) . ? 
C21 C22 1.508(4) . ? 
C22 C23 1.512(5) . ? 
C23 C24 1.509(4) . ? 
C24 C25 1.514(4) . ? 
C25 C26 1.504(5) . ? 
C26 C27 1.509(4) . ? 
C27 C28 1.503(4) . ? 
C28 C29 1.503(4) . ? 
C29 N32 1.351(4) . ? 
N12 C11 1.405(4) . ? 
N32 C31 1.401(4) . ? 
C31 C32 1.313(7) . ? 
C31 C33 1.372(7) . ? 
C31 C33A 1.391(7) . ? 
C31 C32A 1.433(8) . ? 
C36 C34A 1.218(8) . ? 
C36 C34 1.271(8) . ? 
C36 N31A 1.431(7) . ? 
C36 N31 1.483(7) . ? 
N31 C33 1.323(8) . ? 
C32 C34 1.371(9) . ? 
N31A C32A 1.332(8) . ? 
C33A C34A 1.386(9) . ? 
N11 C13 1.283(4) . ? 
N11 C12 1.334(4) . ? 
C11 C15A 1.343(9) . ? 
C11 C12 1.352(5) . ? 
C11 C15 1.458(9) . ? 
C13 C14 1.413(9) . ? 
C13 C14A 1.429(9) . ? 
C14 C15 1.373(12) . ? 
C14A C15A 1.377(11) . ? 
 
loop_ 
 _geom_angle_atom_site_label_1 
 _geom_angle_atom_site_label_2 
 _geom_angle_atom_site_label_3 
 _geom_angle 
 _geom_angle_site_symmetry_1 
 _geom_angle_site_symmetry_3 
 _geom_angle_publ_flag 
O20 C20 N12 122.1(3) . . ? 
O20 C20 C21 122.9(3) . . ? 
N12 C20 C21 115.0(3) . . ? 
C20 C21 C22 113.5(3) . . ? 
C21 C22 C23 113.5(3) . . ? 
C24 C23 C22 114.5(3) . . ? 
C23 C24 C25 114.2(3) . . ? 
C26 C25 C24 114.3(3) . . ? 
C25 C26 C27 114.7(3) . . ? 
C28 C27 C26 112.7(3) . . ? 
C29 C28 C27 116.6(3) . . ? 
O29 C29 N32 123.5(3) . . ? 
O29 C29 C28 122.9(3) . . ? 
N32 C29 C28 113.6(3) . . ? 
C20 N12 C11 127.2(3) . . ? 
C29 N32 C31 127.2(3) . . ? 
C32 C31 C33 121.2(5) . . ? 
C32 C31 C33A 90.1(5) . . ? 
C33 C31 C33A 56.9(4) . . ? 
C32 C31 N32 119.0(4) . . ? 
C33 C31 N32 119.8(4) . . ? 
C33A C31 N32 125.8(4) . . ? 
C32 C31 C32A 53.0(4) . . ? 
C33 C31 C32A 94.4(4) . . ? 
C33A C31 C32A 113.9(5) . . ? 
N32 C31 C32A 120.2(4) . . ? 
C34A C36 C34 92.1(6) . . ? 
C34A C36 N31A 127.6(5) . . ? 
C34 C36 N31A 54.4(4) . . ? 
C34A C36 N31 58.2(4) . . ? 
C34 C36 N31 118.7(5) . . ? 
N31A C36 N31 100.3(4) . . ? 
C33 N31 C36 115.9(5) . . ? 
C31 C32 C34 118.2(6) . . ? 
N31 C33 C31 122.0(6) . . ? 
C36 C34 C32 123.9(7) . . ? 
C32A N31A C36 111.2(6) . . ? 
N31A C32A C31 126.3(6) . . ? 
C31 C33A C34A 120.4(6) . . ? 
C36 C34A C33A 120.1(7) . . ? 
C13 N11 C12 117.3(3) . . ? 
C15A C11 C12 115.8(4) . . ? 
C15A C11 N12 115.7(4) . . ? 
C12 C11 N12 124.7(3) . . ? 
C15A C11 C15 37.2(4) . . ? 
C12 C11 C15 112.4(4) . . ? 
N12 C11 C15 120.5(4) . . ? 
N11 C12 C11 125.5(4) . . ? 
N11 C13 C14 123.3(4) . . ? 
N11 C13 C14A 116.2(4) . . ? 
C14 C13 C14A 39.2(4) . . ? 
C15 C14 C13 114.1(7) . . ? 
C14 C15 C11 121.3(7) . . ? 
C15A C14A C13 120.9(7) . . ? 
C11 C15A C14A 116.3(7) . . ? 
 
_diffrn_measured_fraction_theta_max    0.999 
_diffrn_reflns_theta_full              24.98 
_diffrn_measured_fraction_theta_full   0.999 
_refine_diff_density_max    0.193 
_refine_diff_density_min   -0.243 
_refine_diff_density_rms    0.046 
#END
data_4e 
 
_audit_creation_method            SHELXL-97 
_chemical_name_systematic 
; 
 ? 
; 
_chemical_name_common             ? 
_chemical_melting_point           ? 
_chemical_formula_moiety          ? 
_chemical_formula_sum 
 'C18 H14 N4 O2' 
_chemical_formula_weight          318.33 
 
loop_ 
 _atom_type_symbol 
 _atom_type_description 
 _atom_type_scat_dispersion_real 
 _atom_type_scat_dispersion_imag 
 _atom_type_scat_source 
 'C'  'C'   0.0033   0.0016 
 'International Tables Vol C Tables 4.2.6.8 and 6.1.1.4' 
 'H'  'H'   0.0000   0.0000 
 'International Tables Vol C Tables 4.2.6.8 and 6.1.1.4' 
 'N'  'N'   0.0061   0.0033 
 'International Tables Vol C Tables 4.2.6.8 and 6.1.1.4' 
 'O'  'O'   0.0106   0.0060 
 'International Tables Vol C Tables 4.2.6.8 and 6.1.1.4' 
 
_symmetry_cell_setting            Monoclinic 
_symmetry_space_group_name_H-M    P2(1)/c 
 
loop_ 
 _symmetry_equiv_pos_as_xyz 
 'x, y, z' 
 '-x, y+1/2, -z+1/2' 
 '-x, -y, -z' 
 'x, -y-1/2, z-1/2' 
 
_cell_length_a                    5.2550(11) 
_cell_length_b                    21.051(4) 
_cell_length_c                    6.8150(14) 
_cell_angle_alpha                 90.00 
_cell_angle_beta                  106.62(3) 
_cell_angle_gamma                 90.00 
_cell_volume                      722.4(3) 
_cell_formula_units_Z             2 
_cell_measurement_temperature     293(2) 
_cell_measurement_reflns_used     25 
_cell_measurement_theta_min       8
_cell_measurement_theta_max       12 
 
_exptl_crystal_description        needdle 
_exptl_crystal_colour             colorless 
_exptl_crystal_size_max           0.18 
_exptl_crystal_size_mid           0.14 
_exptl_crystal_size_min           0.10 
_exptl_crystal_density_meas       'not measured' 
_exptl_crystal_density_diffrn     1.464 
_exptl_crystal_density_method     'not measured' 
_exptl_crystal_F_000              332 
_exptl_absorpt_coefficient_mu     0.099 
_exptl_absorpt_correction_type    none 
_exptl_absorpt_correction_T_min   ? 
_exptl_absorpt_correction_T_max   ? 
_exptl_absorpt_process_details    ? 
 
_exptl_special_details 
; 
 ? 
; 
 
_diffrn_ambient_temperature       293(2) 
_diffrn_radiation_wavelength      0.71073 
_diffrn_radiation_type            MoK\a 
_diffrn_radiation_source          'fine-focus sealed tube' 
_diffrn_radiation_monochromator   graphite 
_diffrn_measurement_device_type   CAD4 
_diffrn_measurement_method        \w-scan 
_diffrn_detector_area_resol_mean  ? 
_diffrn_standards_number          3 
_diffrn_standards_interval_count  ? 
_diffrn_standards_interval_time   60 
_diffrn_standards_decay_%         0 
_diffrn_reflns_number             2946 
_diffrn_reflns_av_R_equivalents   0.2946 
_diffrn_reflns_av_sigmaI/netI     0.2167 
_diffrn_reflns_limit_h_min        0 
_diffrn_reflns_limit_h_max        6 
_diffrn_reflns_limit_k_min        -24 
_diffrn_reflns_limit_k_max        24 
_diffrn_reflns_limit_l_min        -8 
_diffrn_reflns_limit_l_max        7 
_diffrn_reflns_theta_min          3.27 
_diffrn_reflns_theta_max          25.00 
_reflns_number_total              1168 
_reflns_number_gt                 675 
_reflns_threshold_expression      >2sigma(I) 
 
_computing_data_collection        ? 
_computing_cell_refinement        ? 
_computing_data_reduction         ? 
_computing_structure_solution     'SHELXS-97 (Sheldrick, 1990)' 
_computing_structure_refinement   'SHELXL-97 (Sheldrick, 1997)' 
_computing_molecular_graphics     ? 
_computing_publication_material   ? 
 
_refine_special_details 
; 
 Refinement of F^2^ against ALL reflections.  The weighted R-factor wR and 
 goodness of fit S are based on F^2^, conventional R-factors R are based 
 on F, with F set to zero for negative F^2^. The threshold expression of 
 F^2^ > 2sigma(F^2^) is used only for calculating R-factors(gt) etc. and is 
 not relevant to the choice of reflections for refinement.  R-factors based 
 on F^2^ are statistically about twice as large as those based on F, and R- 
 factors based on ALL data will be even larger. 
; 
 
_refine_ls_structure_factor_coef  Fsqd  
_refine_ls_matrix_type            full 
_refine_ls_weighting_scheme       calc  
_refine_ls_weighting_details 
 'calc w=1/[\s^2^(Fo^2^)+(0.0826P)^2^+0.0227P] where P=(Fo^2^+2Fc^2^)/3' 
_atom_sites_solution_primary      direct 
_atom_sites_solution_secondary    difmap 
_atom_sites_solution_hydrogens    geom 
_refine_ls_hydrogen_treatment     constr 
_refine_ls_extinction_method      SHELXL 
_refine_ls_extinction_coef        0.11(3) 
_refine_ls_extinction_expression 
 'Fc^*^=kFc[1+0.001xFc^2^\l^3^/sin(2\q)]^-1/4^' 
_refine_ls_number_reflns          1168 
_refine_ls_number_parameters      110 
_refine_ls_number_restraints      0 
_refine_ls_R_factor_all           0.1207 
_refine_ls_R_factor_gt            0.0683 
_refine_ls_wR_factor_ref          0.1838 
_refine_ls_wR_factor_gt           0.1402 
_refine_ls_goodness_of_fit_ref    1.050 
_refine_ls_restrained_S_all       1.050 
_refine_ls_shift/su_max           0.000 
_refine_ls_shift/su_mean          0.000 
 
loop_ 
 _atom_site_label 
 _atom_site_type_symbol 
 _atom_site_fract_x 
 _atom_site_fract_y 
 _atom_site_fract_z 
 _atom_site_U_iso_or_equiv 
 _atom_site_adp_type 
 _atom_site_occupancy 
 _atom_site_symmetry_multiplicity 
 _atom_site_calc_flag 
 _atom_site_refinement_flags 
 _atom_site_disorder_assembly 
 _atom_site_disorder_group 
N11 N 0.2033(5) 0.21879(15) 0.8235(4) 0.0562(9) Uani 1 1 d . . . 
N12 N 0.1849(5) 0.09807(14) 0.4625(3) 0.0418(8) Uani 1 1 d . . . 
H12 H 0.0179 0.0896 0.4298 0.050 Uiso 1 1 calc R . . 
O16 O 0.5766(4) 0.08537(14) 0.4114(3) 0.0569(8) Uani 1 1 d . . . 
C11 C 0.3009(5) 0.13758(16) 0.6362(4) 0.0376(8) Uani 1 1 d . . . 
C12 C 0.1231(6) 0.18034(17) 0.6621(5) 0.0476(9) Uani 1 1 d . . . 
H12A H -0.0471 0.1829 0.5721 0.057 Uiso 1 1 calc R . . 
C13 C 0.4753(7) 0.21485(19) 0.9625(5) 0.0557(10) Uani 1 1 d . . . 
H13 H 0.5193 0.2437 1.0703 0.067 Uiso 1 1 calc R . . 
C14 C 0.6660(6) 0.17406(18) 0.9499(4) 0.0461(9) Uani 1 1 d . . . 
H14 H 0.8351 0.1729 1.0420 0.055 Uiso 1 1 calc R . . 
C15 C 0.5812(5) 0.13426(17) 0.7845(4) 0.0417(8) Uani 1 1 d . . . 
H15 H 0.6987 0.1041 0.7615 0.050 Uiso 1 1 calc R . . 
C16 C 0.3234(5) 0.07602(17) 0.3589(4) 0.0386(8) Uani 1 1 d . . . 
C17 C 0.1506(5) 0.03615(15) 0.1741(4) 0.0367(8) Uani 1 1 d . . . 
C18 C 0.2241(5) 0.03751(15) 0.0154(4) 0.0377(8) Uani 1 1 d . . . 
H18 H 0.3709 0.0613 0.0097 0.045 Uiso 1 1 calc R . . 
C19 C 0.0762(5) 0.00141(16) -0.1572(4) 0.0399(9) Uani 1 1 d . . . 
H19 H 0.1373 0.0029 -0.2725 0.048 Uiso 1 1 calc R . . 
 
loop_ 
 _atom_site_aniso_label 
 _atom_site_aniso_U_11 
 _atom_site_aniso_U_22 
 _atom_site_aniso_U_33 
 _atom_site_aniso_U_23 
 _atom_site_aniso_U_13 
 _atom_site_aniso_U_12 
N11 0.0542(17) 0.067(2) 0.0567(17) -0.0226(14) 0.0312(14) -0.0071(14) 
N12 0.0364(12) 0.066(2) 0.0296(12) -0.0098(11) 0.0204(10) -0.0059(12) 
O16 0.0418(12) 0.096(2) 0.0413(12) -0.0260(12) 0.0260(9) -0.0167(12) 
C11 0.0407(15) 0.0523(19) 0.0251(13) -0.0015(11) 0.0178(11) -0.0061(14) 
C12 0.0347(15) 0.068(3) 0.0445(17) -0.0089(15) 0.0186(13) 0.0005(15) 
C13 0.064(2) 0.070(3) 0.0445(17) -0.0179(16) 0.0330(15) -0.0137(18) 
C14 0.0477(16) 0.066(2) 0.0262(14) -0.0076(13) 0.0135(12) -0.0119(16) 
C15 0.0467(16) 0.054(2) 0.0301(15) 0.0045(12) 0.0201(12) 0.0019(15) 
C16 0.0403(15) 0.0545(19) 0.0248(12) -0.0013(12) 0.0158(11) 0.0005(13) 
C17 0.0362(13) 0.0500(19) 0.0284(14) -0.0005(12) 0.0165(11) 0.0016(14) 
C18 0.0391(14) 0.0445(19) 0.0348(14) -0.0014(12) 0.0191(12) -0.0057(14) 
C19 0.0386(14) 0.063(2) 0.0245(12) -0.0012(12) 0.0195(11) -0.0013(14) 
 
_geom_special_details 
; 
 All esds (except the esd in the dihedral angle between two l.s. planes) 
 are estimated using the full covariance matrix.  The cell esds are taken 
 into account individually in the estimation of esds in distances, angles 
 and torsion angles; correlations between esds in cell parameters are only 
 used when they are defined by crystal symmetry.  An approximate (isotropic) 
 treatment of cell esds is used for estimating esds involving l.s. planes. 
; 
 
loop_ 
 _geom_bond_atom_site_label_1 
 _geom_bond_atom_site_label_2 
 _geom_bond_distance 
 _geom_bond_site_symmetry_2 
 _geom_bond_publ_flag 
N11 C12 1.333(4) . ? 
N11 C13 1.474(5) . ? 
N12 C16 1.240(4) . ? 
N12 C11 1.432(4) . ? 
N12 H12 0.8600 . ? 
O16 C16 1.290(3) . ? 
C11 C12 1.345(4) . ? 
C11 C15 1.531(4) . ? 
C12 H12A 0.9300 . ? 
C13 C14 1.341(5) . ? 
C13 H13 0.9300 . ? 
C14 C15 1.373(4) . ? 
C14 H14 0.9300 . ? 
C15 H15 0.9300 . ? 
C16 C17 1.569(4) . ? 
C17 C18 1.249(4) . ? 
C17 C19 1.407(4) 3 ? 
C18 C19 1.429(4) . ? 
C18 H18 0.9300 . ? 
C19 C17 1.407(4) 3 ? 
C19 H19 0.9300 . ? 
 
loop_ 
 _geom_angle_atom_site_label_1 
 _geom_angle_atom_site_label_2 
 _geom_angle_atom_site_label_3 
 _geom_angle 
 _geom_angle_site_symmetry_1 
 _geom_angle_site_symmetry_3 
 _geom_angle_publ_flag 
C12 N11 C13 121.0(3) . . ? 
C16 N12 C11 120.5(2) . . ? 
C16 N12 H12 119.7 . . ? 
C11 N12 H12 119.7 . . ? 
C12 C11 N12 110.5(2) . . ? 
C12 C11 C15 121.1(3) . . ? 
N12 C11 C15 128.3(3) . . ? 
N11 C12 C11 116.6(3) . . ? 
N11 C12 H12A 121.7 . . ? 
C11 C12 H12A 121.7 . . ? 
C14 C13 N11 126.9(3) . . ? 
C14 C13 H13 116.6 . . ? 
N11 C13 H13 116.6 . . ? 
C13 C14 C15 111.7(3) . . ? 
C13 C14 H14 124.1 . . ? 
C15 C14 H14 124.1 . . ? 
C14 C15 C11 122.6(3) . . ? 
C14 C15 H15 118.7 . . ? 
C11 C15 H15 118.7 . . ? 
N12 C16 O16 120.8(3) . . ? 
N12 C16 C17 111.0(2) . . ? 
O16 C16 C17 128.2(2) . . ? 
C18 C17 C19 114.0(3) . 3 ? 
C18 C17 C16 115.6(3) . . ? 
C19 C17 C16 130.4(2) 3 . ? 
C17 C18 C19 118.1(3) . . ? 
C17 C18 H18 121.0 . . ? 
C19 C18 H18 121.0 . . ? 
C17 C19 C18 127.9(2) 3 . ? 
C17 C19 H19 116.0 3 . ? 
C18 C19 H19 116.0 . . ? 
 
_diffrn_measured_fraction_theta_max    0.705 
_diffrn_reflns_theta_full              27.48 
_diffrn_measured_fraction_theta_full   0.705 
_refine_diff_density_max    0.277 
_refine_diff_density_min   -0.354 
_refine_diff_density_rms    0.087 
#END
data_6a 
 
_audit_creation_method            SHELXL-97 
_chemical_name_systematic 
; 
 ? 
; 
_chemical_name_common             ? 
_chemical_melting_point           ? 
_chemical_formula_moiety          ? 
_chemical_formula_sum 
 'C14 H16 N4 O4' 
_chemical_formula_weight          304.31 
 
loop_ 
 _atom_type_symbol 
 _atom_type_description 
 _atom_type_scat_dispersion_real 
 _atom_type_scat_dispersion_imag 
 _atom_type_scat_source 
 'C'  'C'   0.0033   0.0016 
 'International Tables Vol C Tables 4.2.6.8 and 6.1.1.4' 
 'H'  'H'   0.0000   0.0000 
 'International Tables Vol C Tables 4.2.6.8 and 6.1.1.4' 
 'N'  'N'   0.0061   0.0033 
 'International Tables Vol C Tables 4.2.6.8 and 6.1.1.4' 
 'O'  'O'   0.0106   0.0060 
 'International Tables Vol C Tables 4.2.6.8 and 6.1.1.4' 
 
_symmetry_cell_setting            Monoclinic
_symmetry_space_group_name_H-M    P2(1)/c 
 
loop_ 
 _symmetry_equiv_pos_as_xyz 
 'x, y, z' 
 '-x, y+1/2, -z+1/2' 
 '-x, -y, -z' 
 'x, -y-1/2, z-1/2' 
 
_cell_length_a                    6.9253(14) 
_cell_length_b                    16.063(3) 
_cell_length_c                    6.8924(14) 
_cell_angle_alpha                 90.00 
_cell_angle_beta                  107.39(3) 
_cell_angle_gamma                 90.00 
_cell_volume                      731.7(3) 
_cell_formula_units_Z             2 
_cell_measurement_temperature     293(2) 
_cell_measurement_reflns_used     25 
_cell_measurement_theta_min       8
_cell_measurement_theta_max       11 
 
_exptl_crystal_description        needle 
_exptl_crystal_colour             colorless 
_exptl_crystal_size_max           0.15 
_exptl_crystal_size_mid           0.10 
_exptl_crystal_size_min           0.10 
_exptl_crystal_density_meas       'not measured' 
_exptl_crystal_density_diffrn     1.381 
_exptl_crystal_density_method     'not measured' 
_exptl_crystal_F_000              320 
_exptl_absorpt_coefficient_mu     0.104 
_exptl_absorpt_correction_type    none
_exptl_absorpt_correction_T_min   ? 
_exptl_absorpt_correction_T_max   ? 
_exptl_absorpt_process_details    ? 
 
_exptl_special_details 
; 
 ? 
; 
 
_diffrn_ambient_temperature       293(2) 
_diffrn_radiation_wavelength      0.71073 
_diffrn_radiation_type            MoK\a 
_diffrn_radiation_source          'fine-focus sealed tube' 
_diffrn_radiation_monochromator   graphite 
_diffrn_measurement_device_type   CAD4 
_diffrn_measurement_method        \w-scan
_diffrn_detector_area_resol_mean  ? 
_diffrn_standards_number          3 
_diffrn_standards_interval_count  ? 
_diffrn_standards_interval_time   60
_diffrn_standards_decay_%         0 
_diffrn_reflns_number             1392 
_diffrn_reflns_av_R_equivalents   0.0231 
_diffrn_reflns_av_sigmaI/netI     0.0192 
_diffrn_reflns_limit_h_min        -8 
_diffrn_reflns_limit_h_max        7 
_diffrn_reflns_limit_k_min        -19 
_diffrn_reflns_limit_k_max        0 
_diffrn_reflns_limit_l_min        0 
_diffrn_reflns_limit_l_max        8 
_diffrn_reflns_theta_min          2.54 
_diffrn_reflns_theta_max          24.97 
_reflns_number_total              1282 
_reflns_number_gt                 1025 
_reflns_threshold_expression      >2sigma(I) 
 
_computing_data_collection        CAD4 
_computing_cell_refinement        CAD4 
_computing_data_reduction         CAD4 
_computing_structure_solution     'SHELXS-97 (Sheldrick, 1990)' 
_computing_structure_refinement   'SHELXL-97 (Sheldrick, 1997)' 
_computing_molecular_graphics     ? 
_computing_publication_material   ? 
 
_refine_special_details 
; 
 Refinement of F^2^ against ALL reflections.  The weighted R-factor wR and 
 goodness of fit S are based on F^2^, conventional R-factors R are based 
 on F, with F set to zero for negative F^2^. The threshold expression of 
 F^2^ > 2sigma(F^2^) is used only for calculating R-factors(gt) etc. and is 
 not relevant to the choice of reflections for refinement.  R-factors based 
 on F^2^ are statistically about twice as large as those based on F, and R- 
 factors based on ALL data will be even larger. 
; 
 
_refine_ls_structure_factor_coef  Fsqd  
_refine_ls_matrix_type            full 
_refine_ls_weighting_scheme       calc  
_refine_ls_weighting_details 
 'calc w=1/[\s^2^(Fo^2^)+(0.1045P)^2^+0.3421P] where P=(Fo^2^+2Fc^2^)/3' 
_atom_sites_solution_primary      direct 
_atom_sites_solution_secondary    difmap 
_atom_sites_solution_hydrogens    geom 
_refine_ls_hydrogen_treatment     mixed 
_refine_ls_extinction_method      none 
_refine_ls_extinction_coef        ? 
_refine_ls_number_reflns          1282 
_refine_ls_number_parameters      101 
_refine_ls_number_restraints      0 
_refine_ls_R_factor_all           0.0711 
_refine_ls_R_factor_gt            0.0547 
_refine_ls_wR_factor_ref          0.1764 
_refine_ls_wR_factor_gt           0.1648 
_refine_ls_goodness_of_fit_ref    1.081 
_refine_ls_restrained_S_all       1.081 
_refine_ls_shift/su_max           0.001 
_refine_ls_shift/su_mean          0.000 
 
loop_ 
 _atom_site_label 
 _atom_site_type_symbol 
 _atom_site_fract_x 
 _atom_site_fract_y 
 _atom_site_fract_z 
 _atom_site_U_iso_or_equiv 
 _atom_site_adp_type 
 _atom_site_occupancy 
 _atom_site_symmetry_multiplicity 
 _atom_site_calc_flag 
 _atom_site_refinement_flags 
 _atom_site_disorder_assembly 
 _atom_site_disorder_group 
O1 O -0.3720(2) -0.35527(10) -0.0065(3) 0.0442(5) Uani 1 1 d . . . 
N1 N -0.7685(3) -0.07275(12) -0.1201(3) 0.0428(6) Uani 1 1 d . . . 
N2 N -0.7113(3) -0.33340(11) -0.0984(3) 0.0313(5) Uani 1 1 d . . . 
H2 H -0.8254 -0.3591 -0.1298 0.038(7) Uiso 1 1 d R . . 
C1 C -0.9269(4) -0.12468(15) -0.1650(4) 0.0444(7) Uani 1 1 d . . . 
H1 H -1.0559 -0.1015 -0.2021 0.053 Uiso 1 1 calc R . . 
C2 C -0.9112(4) -0.20970(15) -0.1597(4) 0.0390(6) Uani 1 1 d . . . 
H2A H -1.0270 -0.2426 -0.1934 0.047 Uiso 1 1 calc R . . 
C3 C -0.7210(3) -0.24648(13) -0.1036(3) 0.0288(5) Uani 1 1 d . . . 
C4 C -0.5542(4) -0.19413(14) -0.0554(4) 0.0340(6) Uani 1 1 d . . . 
H4 H -0.4236 -0.2156 -0.0170 0.041 Uiso 1 1 calc R . . 
C5 C -0.5871(4) -0.10935(15) -0.0660(4) 0.0393(6) Uani 1 1 d . . . 
H5 H -0.4740 -0.0749 -0.0328 0.047 Uiso 1 1 calc R . . 
C6 C -0.5444(3) -0.38200(13) -0.0510(3) 0.0300(6) Uani 1 1 d . . . 
C7 C -0.5905(3) -0.47428(14) -0.0593(4) 0.0354(6) Uani 1 1 d . . . 
H7A H -0.6324 -0.4924 -0.2000 0.043 Uiso 1 1 calc . . . 
H7B H -0.7021 -0.4841 -0.0043 0.043 Uiso 1 1 calc . . . 
O1W O -0.0976(3) -0.08929(12) -0.7161(3) 0.0547(6) Uani 1 1 d . . . 
 
loop_ 
 _atom_site_aniso_label 
 _atom_site_aniso_U_11 
 _atom_site_aniso_U_22 
 _atom_site_aniso_U_33 
 _atom_site_aniso_U_23 
 _atom_site_aniso_U_13 
 _atom_site_aniso_U_12 
O1 0.0271(9) 0.0273(9) 0.0745(13) 0.0005(8) 0.0096(8) 0.0022(7) 
N1 0.0488(13) 0.0229(10) 0.0515(13) 0.0032(9) 0.0069(10) 0.0052(9) 
N2 0.0251(9) 0.0196(9) 0.0465(12) 0.0006(8) 0.0064(8) -0.0010(7) 
C1 0.0371(13) 0.0306(13) 0.0575(17) 0.0022(12) 0.0021(12) 0.0107(10) 
C2 0.0314(13) 0.0286(12) 0.0516(16) 0.0002(10) 0.0039(11) 0.0007(9) 
C3 0.0319(12) 0.0219(11) 0.0302(12) 0.0017(8) 0.0056(9) 0.0025(9) 
C4 0.0311(12) 0.0256(11) 0.0425(14) 0.0017(9) 0.0064(10) 0.0015(9) 
C5 0.0416(13) 0.0248(12) 0.0476(15) 0.0011(10) 0.0074(11) -0.0041(10) 
C6 0.0282(11) 0.0227(11) 0.0374(13) 0.0012(9) 0.0071(9) 0.0022(8) 
C7 0.0320(12) 0.0223(12) 0.0481(14) 0.0006(10) 0.0060(11) 0.0018(9) 
O1W 0.0377(10) 0.0402(11) 0.0874(16) 0.0147(10) 0.0204(10) 0.0115(8) 
 
_geom_special_details 
; 
 All esds (except the esd in the dihedral angle between two l.s. planes) 
 are estimated using the full covariance matrix.  The cell esds are taken 
 into account individually in the estimation of esds in distances, angles 
 and torsion angles; correlations between esds in cell parameters are only 
 used when they are defined by crystal symmetry.  An approximate (isotropic) 
 treatment of cell esds is used for estimating esds involving l.s. planes. 
; 
 
loop_ 
 _geom_bond_atom_site_label_1 
 _geom_bond_atom_site_label_2 
 _geom_bond_distance 
 _geom_bond_site_symmetry_2 
 _geom_bond_publ_flag 
O1 C6 1.219(3) . ? 
N1 C5 1.335(3) . ? 
N1 C1 1.339(3) . ? 
N2 C6 1.351(3) . ? 
N2 C3 1.398(3) . ? 
C1 C2 1.370(3) . ? 
C2 C3 1.389(3) . ? 
C3 C4 1.387(3) . ? 
C4 C5 1.379(3) . ? 
C6 C7 1.514(3) . ? 
C7 C7 1.519(4) 3_445 ? 
 
loop_ 
 _geom_angle_atom_site_label_1 
 _geom_angle_atom_site_label_2 
 _geom_angle_atom_site_label_3 
 _geom_angle 
 _geom_angle_site_symmetry_1 
 _geom_angle_site_symmetry_3 
 _geom_angle_publ_flag 
C5 N1 C1 115.3(2) . . ? 
C6 N2 C3 127.93(18) . . ? 
N1 C1 C2 124.2(2) . . ? 
C1 C2 C3 119.5(2) . . ? 
C4 C3 C2 117.5(2) . . ? 
C4 C3 N2 124.7(2) . . ? 
C2 C3 N2 117.8(2) . . ? 
C5 C4 C3 118.3(2) . . ? 
N1 C5 C4 125.2(2) . . ? 
O1 C6 N2 124.1(2) . . ? 
O1 C6 C7 122.27(19) . . ? 
N2 C6 C7 113.67(18) . . ? 
C6 C7 C7 112.4(2) . 3_445 ? 
 
_diffrn_measured_fraction_theta_max    0.997 
_diffrn_reflns_theta_full              24.97 
_diffrn_measured_fraction_theta_full   0.997 
_refine_diff_density_max    0.585 
_refine_diff_density_min   -0.198 
_refine_diff_density_rms    0.060 
#END
data_6b 
 
_audit_creation_method            SHELXL-97 
_chemical_name_systematic 
; 
 ? 
; 
_chemical_name_common             ? 
_chemical_melting_point           ? 
_chemical_formula_moiety          ? 
_chemical_formula_sum 
 'C16 H18 N4 O2' 
_chemical_formula_weight          298.34 
 
loop_ 
 _atom_type_symbol 
 _atom_type_description 
 _atom_type_scat_dispersion_real 
 _atom_type_scat_dispersion_imag 
 _atom_type_scat_source 
 'C'  'C'   0.0033   0.0016 
 'International Tables Vol C Tables 4.2.6.8 and 6.1.1.4' 
 'H'  'H'   0.0000   0.0000 
 'International Tables Vol C Tables 4.2.6.8 and 6.1.1.4' 
 'N'  'N'   0.0061   0.0033 
 'International Tables Vol C Tables 4.2.6.8 and 6.1.1.4' 
 'O'  'O'   0.0106   0.0060 
 'International Tables Vol C Tables 4.2.6.8 and 6.1.1.4' 
 
_symmetry_cell_setting            Trigonal
_symmetry_space_group_name_H-M    P3(2)21 
 
loop_ 
 _symmetry_equiv_pos_as_xyz 
 'x, y, z' 
 '-y, x-y, z+2/3' 
 '-x+y, -x, z+1/3' 
 'y, x, -z' 
 'x-y, -y, -z+1/3' 
 '-x, -x+y, -z+2/3' 
 
_cell_length_a                    8.6286(12) 
_cell_length_b                    8.6286(12) 
_cell_length_c                    17.727(4) 
_cell_angle_alpha                 90.00 
_cell_angle_beta                  90.00 
_cell_angle_gamma                 120.00 
_cell_volume                      1143.0(3) 
_cell_formula_units_Z             3 
_cell_measurement_temperature     293(2) 
_cell_measurement_reflns_used     25 
_cell_measurement_theta_min       8
_cell_measurement_theta_max       12 
 
_exptl_crystal_description        'diamonds' 
_exptl_crystal_colour             'brown' 
_exptl_crystal_size_max           0.20 
_exptl_crystal_size_mid           0.15 
_exptl_crystal_size_min           0.15 
_exptl_crystal_density_meas       'not measured' 
_exptl_crystal_density_diffrn     1.300 
_exptl_crystal_density_method     'not measured' 
_exptl_crystal_F_000              474 
_exptl_absorpt_coefficient_mu     0.089 
_exptl_absorpt_correction_type    none 
_exptl_absorpt_correction_T_min   ? 
_exptl_absorpt_correction_T_max   ? 
_exptl_absorpt_process_details    ? 
 
_exptl_special_details 
; 
 ? 
; 
 
_diffrn_ambient_temperature       293(2) 
_diffrn_radiation_wavelength      0.71073 
_diffrn_radiation_type            MoK\a 
_diffrn_radiation_source          'fine-focus sealed tube' 
_diffrn_radiation_monochromator   graphite 
_diffrn_measurement_device_type   CAD4 
_diffrn_measurement_method        \w-scan 
_diffrn_detector_area_resol_mean  ? 
_diffrn_standards_number          3 
_diffrn_standards_interval_count  ? 
_diffrn_standards_interval_time   60 
_diffrn_standards_decay_%         0 
_diffrn_reflns_number             1151 
_diffrn_reflns_av_R_equivalents   0.0207 
_diffrn_reflns_av_sigmaI/netI     0.1237 
_diffrn_reflns_limit_h_min        0 
_diffrn_reflns_limit_h_max        10 
_diffrn_reflns_limit_k_min        -10 
_diffrn_reflns_limit_k_max        0 
_diffrn_reflns_limit_l_min        0 
_diffrn_reflns_limit_l_max        21 
_diffrn_reflns_theta_min          2.73 
_diffrn_reflns_theta_max          24.98 
_reflns_number_total              1126 
_reflns_number_gt                 535 
_reflns_threshold_expression      >2sigma(I) 
 
_computing_data_collection        CAD4 
_computing_cell_refinement        CAD4 
_computing_data_reduction         CAD4 
_computing_structure_solution     'SHELXS-97 (Sheldrick, 1990)' 
_computing_structure_refinement   'SHELXL-97 (Sheldrick, 1997)' 
_computing_molecular_graphics     ? 
_computing_publication_material   ? 
 
_refine_special_details 
; 
 Refinement of F^2^ against ALL reflections.  The weighted R-factor wR and 
 goodness of fit S are based on F^2^, conventional R-factors R are based 
 on F, with F set to zero for negative F^2^. The threshold expression of 
 F^2^ > 2sigma(F^2^) is used only for calculating R-factors(gt) etc. and is 
 not relevant to the choice of reflections for refinement.  R-factors based 
 on F^2^ are statistically about twice as large as those based on F, and R- 
 factors based on ALL data will be even larger. 
; 
 
_refine_ls_structure_factor_coef  Fsqd  
_refine_ls_matrix_type            full 
_refine_ls_weighting_scheme       calc  
_refine_ls_weighting_details 
 'calc w=1/[\s^2^(Fo^2^)+(0.0908P)^2^+0.0033P] where P=(Fo^2^+2Fc^2^)/3' 
_atom_sites_solution_primary      direct 
_atom_sites_solution_secondary    difmap 
_atom_sites_solution_hydrogens    geom 
_refine_ls_hydrogen_treatment     constr 
_refine_ls_extinction_method      none 
_refine_ls_extinction_coef        ? 
_refine_ls_abs_structure_details 
 'Flack H D (1983), Acta Cryst. A39, 876-881' 
_refine_ls_abs_structure_Flack    -1(8) 
_refine_ls_number_reflns          1126 
_refine_ls_number_parameters      100 
_refine_ls_number_restraints      0 
_refine_ls_R_factor_all           0.2048 
_refine_ls_R_factor_gt            0.0758 
_refine_ls_wR_factor_ref          0.2103 
_refine_ls_wR_factor_gt           0.1653 
_refine_ls_goodness_of_fit_ref    1.037 
_refine_ls_restrained_S_all       1.037 
_refine_ls_shift/su_max           0.000 
_refine_ls_shift/su_mean          0.000 
 
loop_ 
 _atom_site_label 
 _atom_site_type_symbol 
 _atom_site_fract_x 
 _atom_site_fract_y 
 _atom_site_fract_z 
 _atom_site_U_iso_or_equiv 
 _atom_site_adp_type 
 _atom_site_occupancy 
 _atom_site_symmetry_multiplicity 
 _atom_site_calc_flag 
 _atom_site_refinement_flags 
 _atom_site_disorder_assembly 
 _atom_site_disorder_group 
N11 N 0.5467(8) 0.3058(9) -0.1535(3) 0.0640(17) Uani 1 1 d . . . 
N12 N 0.8494(8) 0.6209(8) 0.0298(2) 0.0587(18) Uani 1 1 d . . . 
H12 H 0.8019 0.5794 0.0731 0.070 Uiso 1 1 calc R . . 
C11 C 0.6915(12) 0.4660(10) -0.1635(3) 0.067(2) Uani 1 1 d . . . 
H11 H 0.7230 0.5069 -0.2127 0.081 Uiso 1 1 calc R . . 
C12 C 0.7973(10) 0.5749(10) -0.1066(3) 0.063(2) Uani 1 1 d . . . 
H12A H 0.8970 0.6849 -0.1178 0.076 Uiso 1 1 calc R . . 
C13 C 0.7547(10) 0.5200(9) -0.0323(3) 0.0495(18) Uani 1 1 d . . . 
C14 C 0.6014(10) 0.3577(10) -0.0206(3) 0.058(2) Uani 1 1 d . . . 
H14 H 0.5636 0.3166 0.0282 0.070 Uiso 1 1 calc R . . 
C15 C 0.5048(10) 0.2571(10) -0.0814(4) 0.066(2) Uani 1 1 d . . . 
H15 H 0.4031 0.1474 -0.0717 0.079 Uiso 1 1 calc R . . 
O21 O 1.0932(8) 0.8520(7) -0.0257(3) 0.094(2) Uani 1 1 d . . . 
C21 C 1.0074(13) 0.7768(12) 0.0304(4) 0.078(3) Uani 1 1 d . . . 
C22 C 1.0699(16) 0.8539(14) 0.1096(4) 0.144(6) Uani 1 1 d . . . 
H22A H 1.0022 0.9115 0.1236 0.173 Uiso 1 1 calc . . . 
H22B H 1.0318 0.7527 0.1433 0.173 Uiso 1 1 calc . . . 
C23 C 1.2334(16) 0.964(2) 0.1256(6) 0.186(8) Uani 1 1 d . . . 
H23A H 1.2765 1.0655 0.0916 0.223 Uiso 1 1 calc . . . 
H23B H 1.3031 0.9063 0.1162 0.223 Uiso 1 1 calc . . . 
 
loop_ 
 _atom_site_aniso_label 
 _atom_site_aniso_U_11 
 _atom_site_aniso_U_22 
 _atom_site_aniso_U_33 
 _atom_site_aniso_U_23 
 _atom_site_aniso_U_13 
 _atom_site_aniso_U_12 
N11 0.071(4) 0.067(4) 0.045(3) 0.000(3) -0.005(3) 0.028(4) 
N12 0.062(4) 0.052(4) 0.040(3) -0.001(3) 0.001(3) 0.012(4) 
C11 0.098(7) 0.071(6) 0.036(3) 0.000(4) 0.002(4) 0.044(5) 
C12 0.075(5) 0.056(5) 0.045(4) -0.001(3) 0.011(4) 0.022(5) 
C13 0.060(5) 0.047(5) 0.038(3) -0.003(3) 0.002(3) 0.025(4) 
C14 0.063(5) 0.063(5) 0.035(3) 0.004(3) -0.001(3) 0.022(5) 
C15 0.067(5) 0.064(5) 0.056(4) 0.005(4) 0.004(4) 0.024(5) 
O21 0.103(5) 0.076(4) 0.062(3) -0.005(3) 0.023(3) 0.013(4) 
C21 0.098(7) 0.074(6) 0.045(4) -0.002(4) 0.020(4) 0.031(6) 
C22 0.144(10) 0.118(9) 0.053(4) -0.027(5) 0.014(6) -0.022(8) 
C23 0.096(8) 0.33(2) 0.154(9) -0.175(12) -0.061(7) 0.128(12) 
 
_geom_special_details 
; 
 All esds (except the esd in the dihedral angle between two l.s. planes) 
 are estimated using the full covariance matrix.  The cell esds are taken 
 into account individually in the estimation of esds in distances, angles 
 and torsion angles; correlations between esds in cell parameters are only 
 used when they are defined by crystal symmetry.  An approximate (isotropic) 
 treatment of cell esds is used for estimating esds involving l.s. planes. 
; 
 
loop_ 
 _geom_bond_atom_site_label_1 
 _geom_bond_atom_site_label_2 
 _geom_bond_distance 
 _geom_bond_site_symmetry_2 
 _geom_bond_publ_flag 
N11 C11 1.333(9) . ? 
N11 C15 1.337(7) . ? 
N12 C21 1.355(9) . ? 
N12 C13 1.388(8) . ? 
C11 C12 1.369(9) . ? 
C12 C13 1.386(7) . ? 
C13 C14 1.379(9) . ? 
C14 C15 1.373(8) . ? 
O21 C21 1.216(8) . ? 
C21 C22 1.531(10) . ? 
C22 C23 1.278(14) . ? 
C23 C23 1.551(17) 5_675 ? 
 
loop_ 
 _geom_angle_atom_site_label_1 
 _geom_angle_atom_site_label_2 
 _geom_angle_atom_site_label_3 
 _geom_angle 
 _geom_angle_site_symmetry_1 
 _geom_angle_site_symmetry_3 
 _geom_angle_publ_flag 
C11 N11 C15 114.7(6) . . ? 
C21 N12 C13 127.9(6) . . ? 
N11 C11 C12 124.9(6) . . ? 
C11 C12 C13 119.6(7) . . ? 
C14 C13 C12 116.4(6) . . ? 
C14 C13 N12 118.9(6) . . ? 
C12 C13 N12 124.6(6) . . ? 
C15 C14 C13 119.7(6) . . ? 
N11 C15 C14 124.6(7) . . ? 
O21 C21 N12 124.4(7) . . ? 
O21 C21 C22 122.0(8) . . ? 
N12 C21 C22 113.6(7) . . ? 
C23 C22 C21 123.0(9) . . ? 
C22 C23 C23 115.5(12) . 5_675 ? 
 
_diffrn_measured_fraction_theta_max    0.999 
_diffrn_reflns_theta_full              24.98 
_diffrn_measured_fraction_theta_full   0.999 
_refine_diff_density_max    0.183 
_refine_diff_density_min   -0.183 
_refine_diff_density_rms    0.046 
#END
data_6c 
 
_audit_creation_method            SHELXL-97 
_chemical_name_systematic 
; 
 ? 
; 
_chemical_name_common             ? 
_chemical_melting_point           ? 
_chemical_formula_moiety          ? 
_chemical_formula_sum 
 'C18 H26 N4 O4' 
_chemical_formula_weight          362.43 
 
loop_ 
 _atom_type_symbol 
 _atom_type_description 
 _atom_type_scat_dispersion_real 
 _atom_type_scat_dispersion_imag 
 _atom_type_scat_source 
 'C'  'C'   0.0033   0.0016 
 'International Tables Vol C Tables 4.2.6.8 and 6.1.1.4' 
 'H'  'H'   0.0000   0.0000 
 'International Tables Vol C Tables 4.2.6.8 and 6.1.1.4' 
 'N'  'N'   0.0061   0.0033 
 'International Tables Vol C Tables 4.2.6.8 and 6.1.1.4' 
 'O'  'O'   0.0106   0.0060 
 'International Tables Vol C Tables 4.2.6.8 and 6.1.1.4' 
 
_symmetry_cell_setting            Monoclinic
_symmetry_space_group_name_H-M    P2(1)/n
 
loop_ 
 _symmetry_equiv_pos_as_xyz 
 'x, y, z' 
 '-x+1/2, y+1/2, -z+1/2' 
 '-x, -y, -z' 
 'x-1/2, -y-1/2, z-1/2' 
 
_cell_length_a                    11.694(2) 
_cell_length_b                    11.655(2) 
_cell_length_c                    15.421(3) 
_cell_angle_alpha                 90.00 
_cell_angle_beta                  109.33(3) 
_cell_angle_gamma                 90.00 
_cell_volume                      1983.3(7) 
_cell_formula_units_Z             4 
_cell_measurement_temperature     293(2) 
_cell_measurement_reflns_used     25 
_cell_measurement_theta_min       8 
_cell_measurement_theta_max       12 
 
_exptl_crystal_description        needle 
_exptl_crystal_colour             colorless 
_exptl_crystal_size_max           0.17 
_exptl_crystal_size_mid           0.12
_exptl_crystal_size_min           0.12 
_exptl_crystal_density_meas       'not measured' 
_exptl_crystal_density_diffrn     1.214 
_exptl_crystal_density_method     'not measured' 
_exptl_crystal_F_000              776 
_exptl_absorpt_coefficient_mu     0.087 
_exptl_absorpt_correction_type    none
_exptl_absorpt_correction_T_min   ? 
_exptl_absorpt_correction_T_max   ? 
_exptl_absorpt_process_details    ? 
 
_exptl_special_details 
; 
 ? 
; 
 
_diffrn_ambient_temperature       293(2) 
_diffrn_radiation_wavelength      0.71073 
_diffrn_radiation_type            MoK\a 
_diffrn_radiation_source          'fine-focus sealed tube' 
_diffrn_radiation_monochromator   graphite 
_diffrn_measurement_device_type   CAD4 
_diffrn_measurement_method        \w-scan 
_diffrn_detector_area_resol_mean  ? 
_diffrn_standards_number          3 
_diffrn_standards_interval_count  ? 
_diffrn_standards_interval_time   60 
_diffrn_standards_decay_%         0 
_diffrn_reflns_number             3560 
_diffrn_reflns_av_R_equivalents   0.2322 
_diffrn_reflns_av_sigmaI/netI     0.0414 
_diffrn_reflns_limit_h_min        0 
_diffrn_reflns_limit_h_max        13 
_diffrn_reflns_limit_k_min        0 
_diffrn_reflns_limit_k_max        13 
_diffrn_reflns_limit_l_min        -18 
_diffrn_reflns_limit_l_max        17 
_diffrn_reflns_theta_min          1.91 
_diffrn_reflns_theta_max          24.98 
_reflns_number_total              3381 
_reflns_number_gt                 2115 
_reflns_threshold_expression      >2sigma(I) 
 
_computing_data_collection        CAD4 
_computing_cell_refinement        CAD4 
_computing_data_reduction         CAD4 
_computing_structure_solution     'SHELXS-97 (Sheldrick, 1990)' 
_computing_structure_refinement   'SHELXL-97 (Sheldrick, 1997)' 
_computing_molecular_graphics     ? 
_computing_publication_material   ? 
 
_refine_special_details 
; 
 Refinement of F^2^ against ALL reflections.  The weighted R-factor wR and 
 goodness of fit S are based on F^2^, conventional R-factors R are based 
 on F, with F set to zero for negative F^2^. The threshold expression of 
 F^2^ > 2sigma(F^2^) is used only for calculating R-factors(gt) etc. and is 
 not relevant to the choice of reflections for refinement.  R-factors based 
 on F^2^ are statistically about twice as large as those based on F, and R- 
 factors based on ALL data will be even larger. 
; 
 
_refine_ls_structure_factor_coef  Fsqd  
_refine_ls_matrix_type            full 
_refine_ls_weighting_scheme       calc  
_refine_ls_weighting_details 
 'calc w=1/[\s^2^(Fo^2^)+(0.1745P)^2^+1.5774P] where P=(Fo^2^+2Fc^2^)/3' 
_atom_sites_solution_primary      direct 
_atom_sites_solution_secondary    difmap 
_atom_sites_solution_hydrogens    geom 
_refine_ls_hydrogen_treatment     constr 
_refine_ls_extinction_method      SHELXL 
_refine_ls_extinction_coef        0.007(4) 
_refine_ls_extinction_expression 
 'Fc^*^=kFc[1+0.001xFc^2^\l^3^/sin(2\q)]^-1/4^' 
_refine_ls_number_reflns          3381 
_refine_ls_number_parameters      236 
_refine_ls_number_restraints      0 
_refine_ls_R_factor_all           0.1301 
_refine_ls_R_factor_gt            0.0760 
_refine_ls_wR_factor_ref          0.3111 
_refine_ls_wR_factor_gt           0.2697 
_refine_ls_goodness_of_fit_ref    1.051 
_refine_ls_restrained_S_all       1.051 
_refine_ls_shift/su_max           0.000 
_refine_ls_shift/su_mean          0.000 
 
loop_ 
 _atom_site_label 
 _atom_site_type_symbol 
 _atom_site_fract_x 
 _atom_site_fract_y 
 _atom_site_fract_z 
 _atom_site_U_iso_or_equiv 
 _atom_site_adp_type 
 _atom_site_occupancy 
 _atom_site_symmetry_multiplicity 
 _atom_site_calc_flag 
 _atom_site_refinement_flags 
 _atom_site_disorder_assembly 
 _atom_site_disorder_group 
O1W O 0.8443(3) 0.3406(3) 0.2063(2) 0.0797(11) Uani 1 1 d . . . 
O2W O 0.9281(4) 0.1618(4) 0.0151(3) 0.1185(18) Uani 1 1 d . . . 
O8 O 0.7727(3) -0.0073(4) 0.0392(2) 0.0894(12) Uani 1 1 d . . . 
N11 N 1.8653(4) -0.1518(5) 0.8313(3) 0.0850(14) Uani 1 1 d . . . 
N12 N 1.5462(3) -0.1690(3) 0.6064(2) 0.0649(11) Uani 1 1 d . . . 
H12 H 1.5487 -0.2206 0.5673 0.078 Uiso 1 1 calc R . . 
C11 C 1.8491(4) -0.2252(5) 0.7627(4) 0.0812(16) Uani 1 1 d . . . 
H11 H 1.9122 -0.2750 0.7650 0.097 Uiso 1 1 calc R . . 
C12 C 1.7449(4) -0.2323(5) 0.6885(3) 0.0733(14) Uani 1 1 d . . . 
H12A H 1.7380 -0.2856 0.6422 0.088 Uiso 1 1 calc R . . 
C13 C 1.6507(4) -0.1593(4) 0.6836(3) 0.0589(11) Uani 1 1 d . . . 
C14 C 1.6657(5) -0.0817(4) 0.7531(3) 0.0717(13) Uani 1 1 d . . . 
H14 H 1.6043 -0.0304 0.7520 0.086 Uiso 1 1 calc R . . 
C15 C 1.7744(5) -0.0815(5) 0.8252(3) 0.0827(16) Uani 1 1 d . . . 
H15 H 1.7841 -0.0286 0.8722 0.099 Uiso 1 1 calc R . . 
N21 N 0.3688(4) -0.2351(4) -0.0895(3) 0.0732(12) Uani 1 1 d . . . 
N22 N 0.6714(3) -0.1054(3) 0.1181(2) 0.0609(10) Uani 1 1 d . . . 
H22 H 0.6751 -0.1261 0.1725 0.073 Uiso 1 1 calc R . . 
C21 C 0.4460(4) -0.1660(4) -0.1090(3) 0.0669(12) Uani 1 1 d . . . 
H21 H 0.4304 -0.1469 -0.1703 0.080 Uiso 1 1 calc R . . 
C22 C 0.5479(4) -0.1200(4) -0.0456(3) 0.0651(12) Uani 1 1 d . . . 
H22A H 0.5981 -0.0709 -0.0641 0.078 Uiso 1 1 calc R . . 
C23 C 0.5743(4) -0.1480(4) 0.0459(3) 0.0562(11) Uani 1 1 d . . . 
C24 C 0.4939(5) -0.2214(5) 0.0676(3) 0.0760(14) Uani 1 1 d . . . 
H24 H 0.5075 -0.2431 0.1282 0.091 Uiso 1 1 calc R . . 
C25 C 0.3949(5) -0.2611(5) -0.0010(4) 0.0864(17) Uani 1 1 d . . . 
H25 H 0.3421 -0.3095 0.0152 0.104 Uiso 1 1 calc R . . 
C1 C 1.4422(4) -0.1086(5) 0.5849(4) 0.0779(15) Uani 1 1 d . . . 
C2 C 1.3497(5) -0.1425(5) 0.4954(4) 0.0851(16) Uani 1 1 d . . . 
H2A H 1.3249 -0.2208 0.5006 0.102 Uiso 1 1 calc . . . 
H2B H 1.3879 -0.1413 0.4483 0.102 Uiso 1 1 calc . . . 
C3 C 1.2387(4) -0.0686(4) 0.4641(3) 0.0701(13) Uani 1 1 d . . . 
H3A H 1.2627 0.0109 0.4627 0.084 Uiso 1 1 calc . . . 
H3B H 1.1955 -0.0747 0.5079 0.084 Uiso 1 1 calc . . . 
C4 C 1.1547(4) -0.1028(4) 0.3695(3) 0.0669(12) Uani 1 1 d . . . 
H4A H 1.1987 -0.0961 0.3264 0.080 Uiso 1 1 calc . . . 
H4B H 1.1330 -0.1828 0.3713 0.080 Uiso 1 1 calc . . . 
C5 C 1.0404(4) -0.0337(4) 0.3339(3) 0.0642(12) Uani 1 1 d . . . 
H5A H 1.0617 0.0462 0.3309 0.077 Uiso 1 1 calc . . . 
H5B H 0.9965 -0.0396 0.3772 0.077 Uiso 1 1 calc . . . 
C6 C 0.9578(4) -0.0707(4) 0.2402(3) 0.0652(12) Uani 1 1 d . . . 
H6A H 0.9317 -0.1490 0.2438 0.078 Uiso 1 1 calc . . . 
H6B H 1.0028 -0.0695 0.1974 0.078 Uiso 1 1 calc . . . 
C7 C 0.8463(4) 0.0062(4) 0.2034(3) 0.0684(13) Uani 1 1 d . . . 
H7A H 0.8038 0.0085 0.2477 0.082 Uiso 1 1 calc . . . 
H7B H 0.8722 0.0836 0.1962 0.082 Uiso 1 1 calc . . . 
C8 C 0.7607(4) -0.0352(4) 0.1123(3) 0.0655(12) Uani 1 1 d . . . 
O1 O 1.4260(4) -0.0345(4) 0.6348(3) 0.134(2) Uani 1 1 d . . . 
 
loop_ 
 _atom_site_aniso_label 
 _atom_site_aniso_U_11 
 _atom_site_aniso_U_22 
 _atom_site_aniso_U_33 
 _atom_site_aniso_U_23 
 _atom_site_aniso_U_13 
 _atom_site_aniso_U_12 
O1W 0.076(2) 0.102(3) 0.0502(18) 0.0004(17) 0.0052(16) -0.0178(19) 
O2W 0.086(3) 0.157(4) 0.077(3) 0.050(3) -0.021(2) -0.049(3) 
O8 0.070(2) 0.132(3) 0.057(2) -0.004(2) 0.0095(17) -0.036(2) 
N11 0.066(3) 0.122(4) 0.052(2) 0.016(3) -0.001(2) -0.023(3) 
N12 0.053(2) 0.076(2) 0.050(2) -0.0085(18) -0.0040(17) 0.0101(18) 
C11 0.054(3) 0.112(4) 0.064(3) 0.015(3) 0.002(2) 0.004(3) 
C12 0.055(3) 0.096(4) 0.058(3) 0.001(3) 0.004(2) 0.004(3) 
C13 0.054(2) 0.072(3) 0.043(2) 0.003(2) 0.0042(19) -0.008(2) 
C14 0.069(3) 0.084(3) 0.051(2) -0.006(2) 0.006(2) -0.006(3) 
C15 0.087(4) 0.102(4) 0.047(3) -0.004(3) 0.006(3) -0.026(3) 
N21 0.062(2) 0.085(3) 0.060(2) -0.009(2) 0.004(2) -0.014(2) 
N22 0.052(2) 0.074(2) 0.0458(19) -0.0005(17) 0.0025(16) -0.0089(18) 
C21 0.062(3) 0.079(3) 0.052(3) -0.007(2) 0.008(2) -0.002(2) 
C22 0.058(3) 0.081(3) 0.051(2) -0.002(2) 0.010(2) -0.008(2) 
C23 0.051(2) 0.063(3) 0.046(2) -0.0031(19) 0.0037(18) 0.0013(19) 
C24 0.080(3) 0.084(3) 0.052(3) 0.005(2) 0.007(2) -0.020(3) 
C25 0.080(3) 0.098(4) 0.068(3) 0.003(3) 0.008(3) -0.034(3) 
C1 0.065(3) 0.084(3) 0.067(3) -0.019(3) -0.003(2) 0.015(3) 
C2 0.066(3) 0.095(4) 0.070(3) -0.014(3) -0.011(2) 0.019(3) 
C3 0.056(3) 0.084(3) 0.056(3) 0.000(2) 0.000(2) 0.011(2) 
C4 0.052(2) 0.074(3) 0.063(3) 0.000(2) 0.003(2) 0.002(2) 
C5 0.055(2) 0.072(3) 0.055(3) 0.002(2) 0.003(2) -0.001(2) 
C6 0.058(3) 0.068(3) 0.057(3) -0.001(2) 0.002(2) -0.001(2) 
C7 0.052(2) 0.078(3) 0.057(3) -0.004(2) -0.005(2) 0.000(2) 
C8 0.053(3) 0.076(3) 0.055(3) -0.006(2) 0.000(2) -0.004(2) 
O1 0.101(3) 0.154(4) 0.100(3) -0.063(3) -0.028(2) 0.062(3) 
 
_geom_special_details 
; 
 All esds (except the esd in the dihedral angle between two l.s. planes) 
 are estimated using the full covariance matrix.  The cell esds are taken 
 into account individually in the estimation of esds in distances, angles 
 and torsion angles; correlations between esds in cell parameters are only 
 used when they are defined by crystal symmetry.  An approximate (isotropic) 
 treatment of cell esds is used for estimating esds involving l.s. planes. 
; 
 
loop_ 
 _geom_bond_atom_site_label_1 
 _geom_bond_atom_site_label_2 
 _geom_bond_distance 
 _geom_bond_site_symmetry_2 
 _geom_bond_publ_flag 
O8 C8 1.226(6) . ? 
N11 C15 1.321(7) . ? 
N11 C11 1.325(7) . ? 
N12 C1 1.348(6) . ? 
N12 C13 1.400(5) . ? 
C11 C12 1.370(6) . ? 
C12 C13 1.374(7) . ? 
C13 C14 1.368(6) . ? 
C14 C15 1.384(7) . ? 
N21 C21 1.316(6) . ? 
N21 C25 1.331(6) . ? 
N22 C8 1.352(6) . ? 
N22 C23 1.392(5) . ? 
C21 C22 1.375(6) . ? 
C22 C23 1.381(6) . ? 
C23 C24 1.391(6) . ? 
C24 C25 1.364(7) . ? 
C1 O1 1.212(6) . ? 
C1 C2 1.498(7) . ? 
C2 C3 1.499(7) . ? 
C3 C4 1.517(6) . ? 
C4 C5 1.500(6) . ? 
C5 C6 1.511(6) . ? 
C6 C7 1.528(6) . ? 
C7 C8 1.509(6) . ? 
 
loop_ 
 _geom_angle_atom_site_label_1 
 _geom_angle_atom_site_label_2 
 _geom_angle_atom_site_label_3 
 _geom_angle 
 _geom_angle_site_symmetry_1 
 _geom_angle_site_symmetry_3 
 _geom_angle_publ_flag 
C15 N11 C11 116.4(4) . . ? 
C1 N12 C13 129.0(4) . . ? 
N11 C11 C12 124.0(5) . . ? 
C11 C12 C13 118.9(5) . . ? 
C14 C13 C12 118.3(4) . . ? 
C14 C13 N12 124.7(4) . . ? 
C12 C13 N12 117.0(4) . . ? 
C13 C14 C15 118.4(5) . . ? 
N11 C15 C14 124.0(5) . . ? 
C21 N21 C25 115.6(4) . . ? 
C8 N22 C23 127.4(4) . . ? 
N21 C21 C22 125.1(5) . . ? 
C21 C22 C23 118.8(5) . . ? 
C22 C23 N22 125.4(4) . . ? 
C22 C23 C24 116.8(4) . . ? 
N22 C23 C24 117.7(4) . . ? 
C25 C24 C23 119.3(5) . . ? 
N21 C25 C24 124.4(5) . . ? 
O1 C1 N12 122.3(5) . . ? 
O1 C1 C2 123.8(5) . . ? 
N12 C1 C2 113.9(4) . . ? 
C1 C2 C3 115.4(4) . . ? 
C2 C3 C4 112.0(4) . . ? 
C5 C4 C3 115.2(4) . . ? 
C4 C5 C6 114.0(4) . . ? 
C5 C6 C7 112.6(4) . . ? 
C8 C7 C6 112.3(4) . . ? 
O8 C8 N22 123.2(4) . . ? 
O8 C8 C7 121.9(4) . . ? 
N22 C8 C7 114.9(4) . . ? 
 
_diffrn_measured_fraction_theta_max    0.971 
_diffrn_reflns_theta_full              24.98 
_diffrn_measured_fraction_theta_full   0.971 
_refine_diff_density_max    0.446 
_refine_diff_density_min   -0.253 
_refine_diff_density_rms    0.066 
#END
data_6d 
 
_audit_creation_method            SHELXL-97 
_chemical_name_systematic 
; 
 ? 
; 
_chemical_name_common             ? 
_chemical_melting_point           ? 
_chemical_formula_moiety          ? 
_chemical_formula_sum 
 'C20 H30 N4 O4' 
_chemical_formula_weight          390.48 
 
loop_ 
 _atom_type_symbol 
 _atom_type_description 
 _atom_type_scat_dispersion_real 
 _atom_type_scat_dispersion_imag 
 _atom_type_scat_source 
 'C'  'C'   0.0033   0.0016 
 'International Tables Vol C Tables 4.2.6.8 and 6.1.1.4' 
 'H'  'H'   0.0000   0.0000 
 'International Tables Vol C Tables 4.2.6.8 and 6.1.1.4' 
 'N'  'N'   0.0061   0.0033 
 'International Tables Vol C Tables 4.2.6.8 and 6.1.1.4' 
 'O'  'O'   0.0106   0.0060 
 'International Tables Vol C Tables 4.2.6.8 and 6.1.1.4' 
 
_symmetry_cell_setting            Orthorhombic
_symmetry_space_group_name_H-M    Pbca 
 
loop_ 
 _symmetry_equiv_pos_as_xyz 
 'x, y, z' 
 '-x+1/2, -y, z+1/2' 
 '-x, y+1/2, -z+1/2' 
 'x+1/2, -y+1/2, -z' 
 '-x, -y, -z' 
 'x-1/2, y, -z-1/2' 
 'x, -y-1/2, z-1/2' 
 '-x-1/2, y-1/2, z' 
 
_cell_length_a                    11.378(2) 
_cell_length_b                    16.380(3) 
_cell_length_c                    22.925(5) 
_cell_angle_alpha                 90.00 
_cell_angle_beta                  90.00 
_cell_angle_gamma                 90.00 
_cell_volume                      4272.7(15) 
_cell_formula_units_Z             8 
_cell_measurement_temperature     293(2) 
_cell_measurement_reflns_used     25 
_cell_measurement_theta_min       9
_cell_measurement_theta_max       13 
 
_exptl_crystal_description        'rectangular blocks' 
_exptl_crystal_colour             colorless 
_exptl_crystal_size_max           0.20 
_exptl_crystal_size_mid           0.20 
_exptl_crystal_size_min           0.15 
_exptl_crystal_density_meas       'not measured' 
_exptl_crystal_density_diffrn     1.214 
_exptl_crystal_density_method     'not measured' 
_exptl_crystal_F_000              1680 
_exptl_absorpt_coefficient_mu     0.086 
_exptl_absorpt_correction_type    none 
_exptl_absorpt_correction_T_min   ? 
_exptl_absorpt_correction_T_max   ? 
_exptl_absorpt_process_details    ? 
 
_exptl_special_details 
; 
 ? 
; 
 
_diffrn_ambient_temperature       293(2) 
_diffrn_radiation_wavelength      0.71073 
_diffrn_radiation_type            MoK\a 
_diffrn_radiation_source          'fine-focus sealed tube' 
_diffrn_radiation_monochromator   graphite 
_diffrn_measurement_device_type   CAD4 
_diffrn_measurement_method        \w-scan 
_diffrn_detector_area_resol_mean  ? 
_diffrn_standards_number          3 
_diffrn_standards_interval_count  ? 
_diffrn_standards_interval_time   60 
_diffrn_standards_decay_%         0 
_diffrn_reflns_number             3604 
_diffrn_reflns_av_R_equivalents   0.0000 
_diffrn_reflns_av_sigmaI/netI     0.0560 
_diffrn_reflns_limit_h_min        0 
_diffrn_reflns_limit_h_max        13 
_diffrn_reflns_limit_k_min        0 
_diffrn_reflns_limit_k_max        19 
_diffrn_reflns_limit_l_min        0 
_diffrn_reflns_limit_l_max        27 
_diffrn_reflns_theta_min          2.35 
_diffrn_reflns_theta_max          24.99 
_reflns_number_total              3604 
_reflns_number_gt                 1884 
_reflns_threshold_expression      >2sigma(I) 
 
_computing_data_collection        CAD4 
_computing_cell_refinement        CAD4 
_computing_data_reduction         CAD4 
_computing_structure_solution     'SHELXS-97 (Sheldrick, 1990)' 
_computing_structure_refinement   'SHELXL-97 (Sheldrick, 1997)' 
_computing_molecular_graphics     ? 
_computing_publication_material   ? 
 
_refine_special_details 
; 
 Refinement of F^2^ against ALL reflections.  The weighted R-factor wR and 
 goodness of fit S are based on F^2^, conventional R-factors R are based 
 on F, with F set to zero for negative F^2^. The threshold expression of 
 F^2^ > 2sigma(F^2^) is used only for calculating R-factors(gt) etc. and is 
 not relevant to the choice of reflections for refinement.  R-factors based 
 on F^2^ are statistically about twice as large as those based on F, and R- 
 factors based on ALL data will be even larger. 
; 
 
_refine_ls_structure_factor_coef  Fsqd  
_refine_ls_matrix_type            full 
_refine_ls_weighting_scheme       calc  
_refine_ls_weighting_details 
 'calc w=1/[\s^2^(Fo^2^)+(0.1287P)^2^+0.4671P] where P=(Fo^2^+2Fc^2^)/3' 
_atom_sites_solution_primary      direct 
_atom_sites_solution_secondary    difmap 
_atom_sites_solution_hydrogens    geom 
_refine_ls_hydrogen_treatment     constr 
_refine_ls_extinction_method      none 
_refine_ls_extinction_coef        ? 
_refine_ls_number_reflns          3604 
_refine_ls_number_parameters      253 
_refine_ls_number_restraints      6 
_refine_ls_R_factor_all           0.1570 
_refine_ls_R_factor_gt            0.0725 
_refine_ls_wR_factor_ref          0.2319 
_refine_ls_wR_factor_gt           0.1875 
_refine_ls_goodness_of_fit_ref    1.007 
_refine_ls_restrained_S_all       1.021 
_refine_ls_shift/su_max           0.000 
_refine_ls_shift/su_mean          0.000 
 
loop_ 
 _atom_site_label 
 _atom_site_type_symbol 
 _atom_site_fract_x 
 _atom_site_fract_y 
 _atom_site_fract_z 
 _atom_site_U_iso_or_equiv 
 _atom_site_adp_type 
 _atom_site_occupancy 
 _atom_site_symmetry_multiplicity 
 _atom_site_calc_flag 
 _atom_site_refinement_flags 
 _atom_site_disorder_assembly 
 _atom_site_disorder_group 
N10 N 0.5730(3) -0.55877(18) 0.27130(14) 0.0569(8) Uani 1 1 d . . . 
H10 H 0.5877 -0.5204 0.2467 0.068 Uiso 1 1 calc R . . 
N11 N 0.7463(3) -0.7783(2) 0.23062(15) 0.0694(9) Uani 1 1 d . . . 
C11 C 0.7638(3) -0.7093(2) 0.20152(19) 0.0668(11) Uani 1 1 d . . . 
H11 H 0.8176 -0.7097 0.1710 0.080 Uiso 1 1 calc R . . 
C12 C 0.7073(3) -0.6376(2) 0.21373(17) 0.0618(10) Uani 1 1 d . . . 
H12 H 0.7220 -0.5914 0.1913 0.074 Uiso 1 1 calc R . . 
C13 C 0.6277(3) -0.6337(2) 0.25979(15) 0.0516(9) Uani 1 1 d . . . 
C14 C 0.6085(3) -0.7055(2) 0.29025(17) 0.0578(10) Uani 1 1 d . . . 
H14 H 0.5555 -0.7070 0.3211 0.069 Uiso 1 1 calc R . . 
C15 C 0.6688(4) -0.7742(2) 0.27402(17) 0.0647(11) Uani 1 1 d . . . 
H15 H 0.6545 -0.8218 0.2950 0.078 Uiso 1 1 calc R . . 
N20 N 0.6552(3) 0.14288(19) 0.47654(13) 0.0608(8) Uani 1 1 d . . . 
H20 H 0.6958 0.1121 0.4993 0.073 Uiso 1 1 calc R . . 
N21 N 0.6720(3) 0.3897(2) 0.52389(16) 0.0743(10) Uani 1 1 d . . . 
C21 C 0.7376(4) 0.3318(3) 0.5495(2) 0.0759(12) Uani 1 1 d . . . 
H21 H 0.7889 0.3471 0.5791 0.091 Uiso 1 1 calc R . . 
C22 C 0.7323(4) 0.2510(3) 0.53387(19) 0.0706(11) Uani 1 1 d . . . 
H22 H 0.7799 0.2131 0.5526 0.085 Uiso 1 1 calc R . . 
C23 C 0.6558(3) 0.2257(2) 0.48996(16) 0.0542(9) Uani 1 1 d . . . 
C24 C 0.5873(4) 0.2851(2) 0.46397(18) 0.0621(10) Uani 1 1 d . . . 
H24 H 0.5347 0.2717 0.4344 0.075 Uiso 1 1 calc R . . 
C25 C 0.5987(4) 0.3646(2) 0.4828(2) 0.0730(12) Uani 1 1 d . . . 
H25 H 0.5510 0.4037 0.4653 0.088 Uiso 1 1 calc R . . 
O30 O 0.4680(3) -0.58810(17) 0.35299(13) 0.0707(8) Uani 1 1 d . . . 
O39 O 0.5340(3) 0.13870(16) 0.39792(13) 0.0740(8) Uani 1 1 d . . . 
C30 C 0.5001(3) -0.5382(2) 0.31581(17) 0.0558(9) Uani 1 1 d . . . 
C31 C 0.4665(3) -0.4505(2) 0.31760(18) 0.0655(11) Uani 1 1 d . . . 
H31A H 0.3884 -0.4453 0.3341 0.079 Uiso 1 1 calc . . . 
H31B H 0.4644 -0.4290 0.2782 0.079 Uiso 1 1 calc . . . 
C32 C 0.5525(4) -0.4009(2) 0.35379(19) 0.0630(11) Uani 1 1 d . . . 
H32A H 0.6313 -0.4101 0.3391 0.076 Uiso 1 1 calc . . . 
H32B H 0.5501 -0.4203 0.3937 0.076 Uiso 1 1 calc . . . 
C33 C 0.5277(4) -0.3093(3) 0.3535(2) 0.0733(12) Uani 1 1 d . . . 
H33A H 0.5402 -0.2884 0.3144 0.088 Uiso 1 1 calc . . . 
H33B H 0.4459 -0.3004 0.3635 0.088 Uiso 1 1 calc . . . 
C34 C 0.6040(5) -0.2624(3) 0.3954(2) 0.0915(15) Uani 1 1 d U . . 
H34A H 0.6837 -0.2624 0.3803 0.110 Uiso 1 1 calc . . . 
H34B H 0.6051 -0.2915 0.4322 0.110 Uiso 1 1 calc . . . 
C35 C 0.5683(6) -0.1734(4) 0.4076(3) 0.138(2) Uani 1 1 d DU . . 
H35A H 0.4837 -0.1679 0.4042 0.165 Uiso 1 1 calc . . . 
H35B H 0.5905 -0.1588 0.4471 0.165 Uiso 1 1 calc . . . 
C36 C 0.6279(6) -0.1161(4) 0.3648(3) 0.132(2) Uani 1 1 d DU . . 
H36A H 0.6098 -0.1325 0.3252 0.158 Uiso 1 1 calc . . . 
H36B H 0.7124 -0.1184 0.3700 0.158 Uiso 1 1 calc . . . 
C37 C 0.5841(6) -0.0289(3) 0.3756(3) 0.127(2) Uani 1 1 d U . . 
H37A H 0.6057 0.0040 0.3420 0.152 Uiso 1 1 calc . . . 
H37B H 0.4989 -0.0303 0.3771 0.152 Uiso 1 1 calc . . . 
C38 C 0.6264(4) 0.0131(3) 0.4282(2) 0.0886(14) Uani 1 1 d . . . 
H38A H 0.7109 0.0064 0.4305 0.106 Uiso 1 1 calc . . . 
H38B H 0.5925 -0.0135 0.4621 0.106 Uiso 1 1 calc . . . 
C39 C 0.5985(4) 0.1041(2) 0.43178(19) 0.0618(10) Uani 1 1 d . . . 
O1W O 0.8019(3) 0.05230(18) 0.55554(15) 0.0931(11) Uani 1 1 d . . . 
O2W O 0.3682(2) 0.07913(17) 0.30489(13) 0.0767(9) Uani 1 1 d . . . 
 
loop_ 
 _atom_site_aniso_label 
 _atom_site_aniso_U_11 
 _atom_site_aniso_U_22 
 _atom_site_aniso_U_33 
 _atom_site_aniso_U_23 
 _atom_site_aniso_U_13 
 _atom_site_aniso_U_12 
N10 0.0676(19) 0.0466(17) 0.056(2) 0.0013(14) 0.0036(16) 0.0050(15) 
N11 0.072(2) 0.056(2) 0.080(2) -0.0109(18) 0.0090(19) 0.0029(17) 
C11 0.066(3) 0.061(3) 0.074(3) -0.003(2) 0.018(2) -0.005(2) 
C12 0.069(2) 0.053(2) 0.064(2) 0.0028(19) 0.010(2) -0.005(2) 
C13 0.055(2) 0.047(2) 0.054(2) -0.0032(17) -0.0024(18) -0.0040(17) 
C14 0.065(2) 0.050(2) 0.058(2) -0.0041(17) 0.0065(19) 0.0023(19) 
C15 0.074(3) 0.051(2) 0.069(3) 0.000(2) -0.003(2) -0.002(2) 
N20 0.074(2) 0.0441(18) 0.064(2) 0.0011(16) -0.0068(17) 0.0062(15) 
N21 0.093(3) 0.056(2) 0.074(2) -0.0092(19) 0.006(2) -0.009(2) 
C21 0.088(3) 0.062(3) 0.078(3) -0.006(2) -0.016(2) -0.003(2) 
C22 0.077(3) 0.057(2) 0.078(3) -0.005(2) -0.010(2) 0.009(2) 
C23 0.056(2) 0.053(2) 0.053(2) 0.0015(18) 0.0032(18) -0.0009(18) 
C24 0.070(2) 0.050(2) 0.066(2) -0.0021(18) -0.0065(19) 0.004(2) 
C25 0.086(3) 0.049(2) 0.083(3) 0.004(2) 0.003(3) 0.009(2) 
O30 0.081(2) 0.0579(18) 0.0731(19) -0.0030(14) 0.0110(15) 0.0038(14) 
O39 0.092(2) 0.0518(17) 0.0780(19) -0.0017(15) -0.0235(16) 0.0042(15) 
C30 0.054(2) 0.055(2) 0.058(2) -0.001(2) -0.001(2) 0.0000(19) 
C31 0.063(2) 0.058(2) 0.075(3) 0.000(2) 0.006(2) 0.011(2) 
C32 0.066(2) 0.047(2) 0.077(3) 0.0001(19) -0.002(2) 0.0037(19) 
C33 0.073(3) 0.057(3) 0.090(3) 0.002(2) 0.008(2) 0.011(2) 
C34 0.117(4) 0.043(2) 0.114(4) -0.013(2) -0.004(3) -0.005(3) 
C35 0.132(5) 0.082(4) 0.199(7) -0.001(4) -0.008(5) -0.016(4) 
C36 0.114(5) 0.092(4) 0.190(7) -0.008(4) 0.015(4) 0.012(4) 
C37 0.168(6) 0.046(3) 0.167(6) -0.023(3) -0.057(5) 0.011(3) 
C38 0.112(4) 0.053(3) 0.101(4) 0.002(2) -0.015(3) 0.006(3) 
C39 0.071(3) 0.047(2) 0.067(3) 0.002(2) -0.001(2) -0.001(2) 
O1W 0.117(3) 0.0584(19) 0.104(2) -0.0079(16) -0.041(2) 0.0154(17) 
O2W 0.094(2) 0.0557(17) 0.080(2) -0.0117(14) -0.0113(17) 0.0123(15) 
 
_geom_special_details 
; 
 All esds (except the esd in the dihedral angle between two l.s. planes) 
 are estimated using the full covariance matrix.  The cell esds are taken 
 into account individually in the estimation of esds in distances, angles 
 and torsion angles; correlations between esds in cell parameters are only 
 used when they are defined by crystal symmetry.  An approximate (isotropic) 
 treatment of cell esds is used for estimating esds involving l.s. planes. 
; 
 
loop_ 
 _geom_bond_atom_site_label_1 
 _geom_bond_atom_site_label_2 
 _geom_bond_distance 
 _geom_bond_site_symmetry_2 
 _geom_bond_publ_flag 
N10 C30 1.357(5) . ? 
N10 C13 1.401(5) . ? 
N11 C11 1.328(5) . ? 
N11 C15 1.331(5) . ? 
C11 C12 1.368(5) . ? 
C12 C13 1.392(5) . ? 
C13 C14 1.385(5) . ? 
C14 C15 1.371(5) . ? 
N20 C39 1.369(5) . ? 
N20 C23 1.391(5) . ? 
N21 C25 1.323(5) . ? 
N21 C21 1.341(5) . ? 
C21 C22 1.371(6) . ? 
C22 C23 1.394(5) . ? 
C23 C24 1.381(5) . ? 
C24 C25 1.379(5) . ? 
O30 C30 1.237(4) . ? 
O39 C39 1.210(5) . ? 
C30 C31 1.488(5) . ? 
C31 C32 1.518(6) . ? 
C32 C33 1.526(6) . ? 
C33 C34 1.506(7) . ? 
C34 C35 1.540(8) . ? 
C35 C36 1.517(5) . ? 
C36 C37 1.532(8) . ? 
C37 C38 1.471(8) . ? 
C38 C39 1.525(6) . ? 
 
loop_ 
 _geom_angle_atom_site_label_1 
 _geom_angle_atom_site_label_2 
 _geom_angle_atom_site_label_3 
 _geom_angle 
 _geom_angle_site_symmetry_1 
 _geom_angle_site_symmetry_3 
 _geom_angle_publ_flag 
C30 N10 C13 129.1(3) . . ? 
C11 N11 C15 115.6(3) . . ? 
N11 C11 C12 123.9(4) . . ? 
C11 C12 C13 120.0(4) . . ? 
C14 C13 C12 116.5(3) . . ? 
C14 C13 N10 125.3(3) . . ? 
C12 C13 N10 118.1(3) . . ? 
C15 C14 C13 118.8(4) . . ? 
N11 C15 C14 125.1(4) . . ? 
C39 N20 C23 128.4(3) . . ? 
C25 N21 C21 116.3(4) . . ? 
N21 C21 C22 122.9(4) . . ? 
C21 C22 C23 120.2(4) . . ? 
C24 C23 C22 117.0(4) . . ? 
C24 C23 N20 126.0(4) . . ? 
C22 C23 N20 116.9(3) . . ? 
C25 C24 C23 118.5(4) . . ? 
N21 C25 C24 125.1(4) . . ? 
O30 C30 N10 122.3(3) . . ? 
O30 C30 C31 122.9(4) . . ? 
N10 C30 C31 114.7(3) . . ? 
C30 C31 C32 111.5(3) . . ? 
C31 C32 C33 113.8(3) . . ? 
C34 C33 C32 113.1(4) . . ? 
C33 C34 C35 116.6(5) . . ? 
C36 C35 C34 110.5(6) . . ? 
C35 C36 C37 109.1(6) . . ? 
C38 C37 C36 117.5(5) . . ? 
C37 C38 C39 115.6(4) . . ? 
O39 C39 N20 123.3(4) . . ? 
O39 C39 C38 123.4(4) . . ? 
N20 C39 C38 113.3(4) . . ? 
 
_diffrn_measured_fraction_theta_max    0.960 
_diffrn_reflns_theta_full              24.99 
_diffrn_measured_fraction_theta_full   0.960 
_refine_diff_density_max    0.379 
_refine_diff_density_min   -0.362 
_refine_diff_density_rms    0.050 
#END
